# Mosquito ‘mate-seeking’ at long-range: are male swarms loud enough to be located by females?

Lionel Feugère<sup>1, 2 \*</sup>, Gabriella Gibson<sup>2</sup>, Nicholas C. Manoukis<sup>3</sup>, Olivier Roux<sup>1, 4</sup>

<sup>1</sup> MIVEGEC, IRD, CNRS, Univ. Montpellier, Montpellier, France.

<sup>2</sup> Natural Resources Institute, University of Greenwich, Chatham, Kent ME4 4TB, UK

<sup>3</sup> Tropical Crop and Commodity Protection Research Unit, Daniel K. Inouye US Pacific Basin Agricultural Research Center, US Department of Agriculture- Agricultural Research Service, 64 Nowelo St. Hilo Hawai‘i USA 96720

<sup>4</sup> Institut de Recherche en Sciences de la Santé (IRSS), 01 BP 545 Bobo-Dioulasso 01, Burkina Faso

\*Correspondence: [lionel.feugere@riseup.net](mailto:lionel.feugere@riseup.net)

## SUMMARY

The high-pitched whine of mosquitoes in flight is produced by their wingbeats, and is heard by conspecifics, who have unsurpassed sound sensitivity among arthropods. We investigated whether female mosquitoes might use the sound of a mating swarm at long-range (several meters) to identify species-specific cues. In the laboratory we exposed free-flying *An. coluzzii* females to pre-recorded male *An. coluzzii* and *An. gambiae* s.s. swarms to assess female response to male flight sounds over a range of ecologically-relevant sound-levels, based on our reference recording (70-male swarm producing 20 dB SPL 0.9m away). Sound-levels tested were related to equivalent distances between the female and the male swarm for a given number of males, enabling us to infer distances over

which females can hear large male swarms. Females did not respond to swarm sounds at 36±3 dB, but their flight speed increased significantly at 48±3 dB, equivalent to a distance of 0.6±0.2 m from a point-source swarm-sound produced by 1,000 males. However, this distance is less than the 1,000-male swarm radius. We show that even for the loudest swarms of 10,000 males, a female will hear an individual male at the edge of the swarm sooner or more loudly than the swarm as a whole, due to the exponential increase of sound at close-range. Therefore, females highly unlikely cannot use swarm sound to locate swarms at long-range. We conclude that mosquito acoustic communication is restricted to close-range dyad interactions.

## KEYWORDS

*Anopheles*, bioacoustics, free-flying mosquitoes, insect hearing, long-range hearing, mating swarm, mosquito hearing, mosquito sound, speciation

## INTRODUCTION

### Mosquito hearing

There is strong evidence that mosquitoes detect individuals of the opposite sex in one-on-one acoustic interactions. The hearing organs of males and females are tuned to ‘difference tones’ derived from the combined wingbeat frequencies of both sexes, discernible indirectly by convergence patterns in the wingbeat harmonics of male and uniseminated female mosquitoes. This acoustic behaviour has been documented in four species of medical importance (*Anopheles gambiae* s.l., *Anopheles albimanus*, *Aedes aegypti* and *Culex quinquefasciatus*), plus *Toxorhynchites brevipalpis* and *Culex pipiens* [1-10] as well as in other flies [11].

52 Mosquito antennae are sound particle-velocity sensors [12-14]. Particle-velocity  
 53 amplitude increases faster than pressure amplitude during the approach to a sound source  
 54 [15]. Accordingly, particle-velocity sensors have an advantage over pressure sensors at  
 55 close range, and, therefore, mosquito hearing has been considered to be a relatively short-  
 56 range sensory system. It is assumed that the hearing distance between a male and a  
 57 female is limited to a range of a few cm to ~ 10 cm [16,17]. However, there is no physical  
 58 reason to consider a particle-velocity sensor to be limited to a given hearing distance,  
 59 since particle velocity is an intrinsic property of any sound, irrespective of the distance  
 60 between the receiver and the sound source [15,18,19]. Indeed, males have been shown to  
 61 respond to artificially loud sound levels of played-back female flight tones metres away  
 62 from the sound source [19]. Thus, to test mosquito hearing at long-range, the following  
 63 question was addressed: is there a natural sound source in the field loud enough to be  
 64 heard by mosquitoes from significant distances?

# 66 **Are male swarms loud enough to be heard by females at long-range?**

67 In mosquitoes, ecologically-relevant sound-sources can be classified by their potential  
 68 function: 1) predator avoidance, 2) detection of moving prey, and 3) communication [20].  
 69 At long-range, only detection of moving prey has been investigated in the case of frog-  
 70 biting flies, such as the mosquito *Culex territans* and the midge subgenus *Corethrella*  
 71 *Coquillett* females which fly toward sound sources of played-back frog calls [21,22].

72 Research on mosquito acoustic communication has been done mostly with pairs  
 73 of tethered mosquitoes exposed to the sound of each other over distances of a few cm [1-  
 74 6,8,9,23-25]. An individual mosquito is a relatively weak sound source. These studies do  
 75 not address the question of whether mosquitoes can locate conspecific males in a mating  
 76 swarm from a distance. Indeed, swarms are the only ecologically-relevant sound-sources  
 77 that are significantly louder than a single mosquito and could be related to acoustic

78 communication. Males aggregate over swarm markers at species-specific times of day  
79 [26], and uninseminated females also display swarming behaviour [25,27-29]. However,  
80 the number of males typically increases quickly during the formation of a swarm, which  
81 raises the hypothesis that a female can be attracted from a distance to species-specific  
82 swarm sounds produced by males in established swarms. If this were the case, we might  
83 expect a single female to hear the significantly louder sound of many males swarming from  
84 a greater distance than from a single male, i.e. the larger the male swarm, the further away  
85 the female might detect the swarm. Males are not expected to hear male swarm as well as  
86 females because mosquito hearing organs are designed to detect opposite-sex sounds [3].

87 A swarm can consist of thousands of individuals [31-33], establishing relatively  
88 dense station-keeping aggregations [34]. Attraction of females to the sound of distant male  
89 swarms has been mentioned in the literature [35] and studies have explored the potential  
90 for using distant mosquito sound as a tool for detection and surveillance of mosquito  
91 populations [36], but to our knowledge this hypothesis has not been tested quantitatively in  
92 the context of intra-mosquito communication. When exposed to opposite-sex sound,  
93 electrophysiological studies show that females are less sensitive to sound than males  
94 [1,17,19], however, female hearing sensitivity is similar to the male's one when their own  
95 wingbeat are simulated in addition to the opposite-sex sound, revealing that free-flying  
96 females may be as sensitive to sound as males [20]. Although females have not been  
97 shown to move toward a source of male sound (phonotaxis), they do alter their wingbeat  
98 frequency when exposed to male sound [1,3,38-40].

99

# 100 **Potential importance of distant swarm sound in on-going speciation?**

101 Subtle differences in swarming behaviour between closely related species minimize  
102 hybridisation within the *An. gambiae s.l.* species complex (e.g., *An. coluzzii* and *An.*  
103 *gambiae s.s.*) [41,42]. Female auditory detection of a con-specific swarm of males at long

range could increase the female's likelihood of locating and being inseminated by a male of the same species. A female might recognize a species-specific sound signature at long-range before males of any other species could hear, chase and mate with her. Inconsistent results on species-specific acoustic cues in *An. coluzzii* and *An. gambiae* s.s. have been reported based on studies of single male or dyad interactions.

Laboratory-based research characterising the flight tones of single males flying in small mosquito cages found no significant differences between the fundamental frequencies of *An. coluzzii* and *An. gambiae* s.s.; however, significant differences were found in the second harmonic amplitude [43]. Another study of the patterns of flight tone interactions between a tethered male and a tethered female of closely related species of *An. gambiae* s.l. found frequency-matching occurred more consistently within pairs of the same molecular form than in hetero-specific pairs [4]. However, in a separate study, a type of acoustic interaction associated with mating (rapid wingbeat frequency modulations) was elicited by males when they were close to a female [6,8,9], but rapid-frequency modulations in males of both *An. coluzzii* and *An. gambiae* s.s. were similar when exposed to pure tones mimicking the female's fundamental wingbeat frequency [44].

An important lacuna in the literature remains regarding the more realistic scenario of a single female detecting an entire swarm of males. Thus, in the present study we investigated the possibility that females hear male swarms from a distance by presenting sound recordings of swarming males to free-flying uninseminated females. Results directly address the question; do females detect male aggregations in the field?

## Experiment design

Our hypothesis is that *An. coluzzii* female mosquitoes can detect distant sounds of swarming males at natural sound levels. We chose to work with the mosquito species *An. coluzzii* because a) the male swarming behaviour is well known to be confined to stereo-

130 typical looping flight within a limited area over a stationary visual marker, b) males  
 131 naturally gather in the thousands, forming relatively dense station-keeping swarms [31,33],  
 132 and c) less well-known, uninseminated females also swarm [25,27-29], which is rarely  
 133 observed in the field for several reasons: the ratio of females:males is extremely low  
 134 (females generally mate once in a lifetime), swarming males are quick to chase a female  
 135 and mate, and once insemination begins females leave the swarm [45]. Thus the mating  
 136 behavior of this species is relatively better-known, and the potential for positive phonotaxis  
 137 from females is high.

138         We recorded ambient sound in the field near naturally swarming *An. coluzzii*  
 139 males to determine whether any other animal or environmental sounds were present that  
 140 could hide/mask swarm sounds. Next, we conducted behavioural experiments in an  
 141 environmentally controlled laboratory fitted with a soundproof chamber to isolate the  
 142 behavioural set-up from extraneous sounds. Experiments were conducted with mosquitoes  
 143 reared at the University of Greenwich from colonies of *An. coluzzii* and *An. gambiae* s.s.  
 144 provided by IRSS.

145         Audio-video recording instruments were used for two purposes (Figure 1): first, to  
 146 record sound of large station-keeping swarms of males of the two closely related species  
 147 (Sound S1, Sound S2) and second to record the behaviour of females exposed to these  
 148 playback swarm sounds (Video S1). Free-flying uninseminated females were released in  
 149 a swarming arena (L x W x H = 1.8 m x 1.7 m x 2 m) that provided the visual cues to  
 150 initiate swarming (figure-of-eight loops) over a visual marker, effectively confining them to  
 151 a volume of 0.06 m<sup>3</sup> and within a fixed distance of 0.9±0.2 m from the source of male  
 152 sound (Figure 2A). The physical distance between a female and the male sound-source  
 153 image was simulated by adjusting the sound level of each of the sound stimuli played-back  
 154 on the speaker (Figure 3). The measure of a ‘response’ in the female’s behaviour was  
 155 defined as a change in flight (including phono-taxis) or wingbeat characteristics when

156 exposed to each of the four levels of intensity of sound stimuli playbacks, including a  
157 reference sound recording corresponding to a 70-male swarm at an equivalent distance of  
158 0.9 m.

159 We used two criteria to determine whether or not a female can hear the sound  
160 stimulus: a change in wingbeat frequency and/or a change in flight speed. In principle, the  
161 significant change in her wingbeat frequency increases the strength of the input to the  
162 nervous system, thereby increasing her ability to hear and locate the male [3,11]. A  
163 change in flight speed which indicates a change in flight trajectory (uninseminated females  
164 are observed to fly toward male swarms [9,24,45], but we don't know whether it is due to  
165 the swarm sound). Finally, the measured results were extrapolated to estimate how far  
166 away a female mosquito can hear a swarm of a given number of males. Figure 3  
167 summarises the experimental protocol and the raw results.

168 Our hypothesis, that female *Anopheles* mosquitoes can hear male swarms from  
169 large distances, was not supported. We show that although females do respond to the  
170 sound of a male swarm, the sound levels of swarms over distances of metres are too low  
171 to be heard by females. Some uncertainties are still present for the largest swarms, but our  
172 results indicate that it is unlikely a female can hear a swarm before coming into close  
173 proximity of a male located on the swarm's periphery.

174

## 175 RESULTS

176

### 177 Field recordings show salient swarm-sounds at least up to 3 m from the swarm

178 Relative flight-sound intensities of wild male *An. coluzzii* swarms were measured to  
179 characterise the sound profile of typical male swarms in relation to the background sounds  
180 of other twilight-active organisms, including humans, near rice fields in village VK5,  
181 Burkina Faso. We recorded ambient sound at ~ 1 m from a swarm consisting of several

182 thousand male *An. coluzzii* around sunset. The recording included background noises  
183 from insects, birds, mammals, human speech, children crying, sunset call to prayer, and  
184 motor vehicles. The loudest sounds were produced by insects and mammals, but at  
185 frequency bandwidths that did not coincide with the swarm's first harmonic. The sound of  
186 mosquito swarms was the only continuous sound in the 100-1000 Hz frequency band (see  
187 spectrograms in Figure S1).

188 In addition to these preliminary field recordings at 1 m from the swarm, we found  
189 that the first harmonic amplitude of the sound pressure was 10% higher than the  
190 background noise (50-Hz smoothed magnitude spectrum), irrespective of which side of the  
191 swarm was recorded, i.e. from ground level to the top of a ~3 m-high swarm, and  
192 horizontally, on two opposing sides of the swarm at ~3 m from the centre of the swarm.  
193 This indicates that the signal-to-noise ratio of the swarm sound can potentially be loud  
194 enough to be heard by females at least ~3 m away from the centre of the swarm.

## 195 196 **Typical sound level of a 70-male swarm and species-specific cues**

197 In the soundproof chamber with semi-absorbent walls (reverberation time of 0.05 s in the  
198 first-harmonic frequency band), the first-harmonic sound pressure level ('SPL': root-mean-  
199 square SPL ref 20  $\mu$ Pa) of a station-keeping swarm of ~70 male *An. coluzzii* was  $20 \pm 3$  dB  
200 at a distance of 0.9 m from the microphone to the swarm centre, which was 0.6 m high  
201 (see Figure 1).

202 The sound of a swarm is composed of the flight sound of individual males. As they  
203 probably cannot synchronize the phase of their wingbeats and since the sound of a swarm  
204 from a distance is relatively steady over time, the only species-specific sound cues of a  
205 swarm, if any, would come from the frequency content (i.e. not from specific sound phases  
206 or time-changing patterns). Sound S1 and Sound S2 are the male sound stimuli used for  
207 playback for each of the two species, respectively (before any filtering, see Figure S2).



208 Figure S2C shows the great similarity between the sound spectra of the swarm stimuli of  
 209 the two species, *An. coluzzii* and *An. gambiae* s.s: the relative second and third harmonic  
 210 amplitudes were the same; the fourth-harmonic amplitudes differed, but their respective  
 211 frequencies were both far above mosquito audibility [3]; the mean swarm wingbeat  
 212 frequencies differed slightly by 21 Hz (857 Hz for *An. coluzzii* and 836 Hz for *An. gambiae*  
 213 s.s.), but with a large overlap of 47 Hz of the harmonic peak bandwidth at -3 dB. Note that  
 214 the 30-male *An. gambiae* swarm sound-level was increased to be the same as that of 70-  
 215 male *An. coluzzii* swarm, as shown in Table 1, by using the *An. coluzzii* first-harmonic  
 216 amplitude as a normalisation factor (see STAR\*Methods section ‘Sound stimuli’).

217

# **218 How loud must a swarm be for a female to hear it and is is species-specific?**

219 We played-back the sound of male swarms to a group of 1-5 swarming *An. coluzzii*  
 220 females (Figure S3) at four different sound levels (Table 1) and we tested whether the  
 221 females responded to the sound stimulus by changing their wingbeat frequency or flight  
 222 trajectory dynamics ( $n=10$  to 12 replicates per sound level, depending on the sound  
 223 stimulus). The playback speaker was placed at a constant distance of 0.9 m from the  
 224 female(s), which swarmed at an oscillating distance of  $\pm 0.2$  m to the speaker (Figure 2A).  
 225 The reciprocal was done with 1-6 swarming males exposed to the sound of swarming  
 226 females, as a control ( $n=9$  to 10 replicates, depending on the sound stimulus). Sound S3  
 227 and Sound S4 are the female-swarm sounds of the two species, respectively (before any  
 228 filtering, see Figure S2).

229 Figure 2B shows the distribution of positions (in three dimensions), linear speed,  
 230 angular speed and mean wingbeat frequencies produced by groups of 1-5 females or 1-6  
 231 males, before, during and after exposure to the loudest opposite-sex sound stimuli ( $48 \pm 3$   
 232 dB SPL). For each replicate and for each stimulus sound level, we measured the

233 difference between the maximum wingbeat frequency reached during the 7 s sound  
234 stimulus and during the 7 s before the sound stimulus. We did the same for linear speed.

235 Our results (Figure 4A) show that free-flying females respond to the sound  
236 stimuli by changing their linear flight speed with respect to SPL (LRT,  $\chi^2=4.3$ ,  $p=0.037$ ),  
237 and that the 48 dB SPL distribution was significantly different from the intercept (one-  
238 sample  $t(22)=3.58$ , BH-corrected  $p=0.0067$ , mean=4 cm/s) showing a 4 cm/s increase in  
239 the maximum linear speed reached during the sound stimulus (mean speed without sound  
240 stimulus: 44 cm/s). There was no significant effect on the wingbeat frequency parameter  
241 (LRT,  $\chi^2=0.46$ ,  $p=0.50$ ) and there was no effect of species or an interaction effect  
242 between species and SPL for females exposed to male sound stimuli, as expected by the  
243 absence of significant differences in the swarm sound of the two species (see previous  
244 Results section).

245 Males were exposed to swarming female sounds as a control, because males are  
246 known to be more responsive to sound than females [37]. Our experimental protocol  
247 demonstrates that the reciprocal test of male response to female sound stimuli resulted in  
248 a highly significant response (Figure 4B). Indeed, for males, the effect of SPL on the  
249 maximum WBF difference was highly significant (LRT,  $\chi^2=18.8$ ,  $p<0.001$ ), and the 45dB  
250 distribution was highly significantly-different from the intercept (one-sample  $t(17)=5.45$ ,  
251  $p<0.001$ , mean=36 Hz for a mean wingbeat frequency of 803 Hz before the sound  
252 stimulus). However, there was no overall effect of the SPL on maximum linear speed (non-  
253 significant LRT  $\chi^2$ , but the 36 dB distribution shows a significant difference with the  
254 intercept ( $t(17)=3.64$ , BH-corrected  $p=0.008$ , mean=11 cm/s)).

255 Given the weak statistical significance in the female response to male sound (LRT  
256  $\chi^2$   $p=0.037$  and  $t$ -test  $p=0.0067$ , see paragraph above), we decided to increase the  
257 number of tested parameters to be certain we did not miss any meaningful variables.  
258 Table S1 gives extra eight parameters tested (acoustic & flight parameters). Holm

259 correction of *p*-values for multiple comparisons led to no statistically significant predictors  
260 of female response.

261 Overall, the results support the proposition that a female can hear male-swarm  
262 sound stimuli at 48 dB SPL, but not at 36 dB. At 48 dB SPL, the effect is statistically  
263 significant but small. This suggests that the hearing threshold for females is closer to 48  
264 dB SPL than to 36 dB SPL.

265

## 266 **How far away can a female hear a 70-male swarm?**

267 Neither the sound level of the  $20 \pm 3$  dB SPL stimulus, corresponding to the natural sound  
268 level of a 70-male swarm located 0.9 m away from the female, nor the second highest  
269 ( $36 \pm 3$  dB SPL) level elicited a behavioural response from females in the laboratory assay.  
270 However, at the loudest sound level of  $48 \pm 3$  dB SPL, females heard the male swarm  
271 sounds. To test how far away a female can hear, we calculated the equivalent distance  
272 corresponding to the sound of a 70-male swarm at  $36 \pm 3$  or  $48 \pm 3$  dB SPL (see  
273 STAR\*METHODS, sections 'Experiment paradigm' and 'Formulae between sound level  
274 and distance').

275 Accordingly, for a 70-male swarm stimulus modelled as a point source, the  
276 female's hearing distance threshold ranged between  $4 \pm 1$  cm and  $15 \pm 3$  cm (Table 2; see  
277 STAR\*METHODS, section 'RMS particle-velocity estimation' for discussion related to  
278 reproducing a sound-source outside the far-field range; at a distance of 15 cm from this  
279 sound-source, particle-velocity level and SPL are equal within 1 dB). If we consider the  
280 swarm radius of a 70-male swarm to be 0.2 m, as in the laboratory swarm we recorded,  
281 then a single female flying close to such a swarm will hear the male nearest the female  
282 before she would be able to hear the swarm as a whole. Indeed, the short distance  
283 between the female and the first male encountered at the edge of the swarm will produce  
284 sound that is louder than that of the rest of the swarm as a whole, because of the rapid

285 increase of particle velocity in the vicinity of a mosquito. Therefore, we conclude that a  
286 female cannot hear a 70-male swarm until she is within its boundary.

287

## 288 **How far away can a female hear a male swarm of a given number of males?**

289 From the conclusions above, it follows that a female can hear a 70-male swarm operating  
290 as a point sound-source (see STAR\*METHODS, section 'Far-field critical distance for  
291 particle velocity') from a distance of  $4 \pm 1$  cm away. Based on this result, we estimated how  
292 far a swarm composed of more males can be heard by a female, based on acoustic  
293 prediction formulae (see STAR\*METHODS, section 'Formula between hearing distance  
294 and number of individuals in the swarm'). Figure 5 shows the female hearing ranges as a  
295 function of distance to the swarm and number of males in the swarm. The 36 dB SPL (no-  
296 response) and the 48 dB SPL (response) allows us to split the 2-D plot into three areas:  
297 the 'no-response' area (red); the 'response' area (green); and the 'hearing threshold' area  
298 (white). The hearing distance threshold stands somewhere in the white area, but as we  
299 saw in a previous section, the hearing distance threshold is expected to be closer to the  
300 green area than to the red area.

301 For illustration, a swarm of 1,000 males can be expected to be heard by a  
302 female at a distance of  $0.15 \pm 0.07$  m, and would certainly not be able to be heard at a  
303 distance of  $0.60 \pm 0.25$  m. Based on the same acoustic prediction, we can extrapolate that a  
304 6,000-male swarm would be heard at a maximum distance ranging from  $0.4 \pm 0.1$  m to  
305  $1.4 \pm 0.5$  m, and from  $0.5 \pm 0.2$  m to  $1.8 \pm 0.7$  m for a 10,000-male swarm. Table 2  
306 incorporates all the acoustic values related to the hearing or non-hearing of five orders of  
307 magnitude in the number of males.

308

## 309 **DISCUSSION**

310

## 311 **Hearing sensitivity of *An. coluzzii* females and males**

312 Previous studies estimated the hearing threshold of tethered *An. gambiae* s.l. females was  
 313 in the range 44-52 dB (particle velocity of  $14 \pm 6 \mu\text{m.s}^{-1}$ ,  $n=5$ ) and tethered *Aedes aegypti*  
 314 females around 55 dB SPL ( $n=10$ ) by monitoring the activity of the Johnston's organ nerve  
 315 [4,19]. In the present study, the sound level eliciting a behavioural response in free-flying  
 316 *An. coluzzii* females was  $48 \pm 3$  dB, with no response at  $36 \pm 3$  dB SPL. For free-flying *An.*  
 317 *coluzzii* males, we found a significant response to  $45 \pm 3$  dB SPL, and a non-significant  
 318 tendency at  $33 \pm 3$  dB, indicating that their hearing thresholds are likely to be  $< 45 \pm 3$  dB for  
 319 males. This is similar to reported values for tethered male *An. gambiae* s.l. ( $18 \pm 6 \mu\text{m.s}^{-1}$ ,  
 320 i.e. 38-39 dB SPL for the SD range in the far-field,  $n=5$ ) from recording the Johnston's  
 321 organ nerve with the antenna fibrillae extended [4], and for tethered male *Culex pipiens*  
 322 *pipiens* ( $32.0 \pm 4.4$  dB sound particle-velocity level,  $n=74$ , equivalent to  $32.0 \pm 4.4$  dB SPL in  
 323 the far-field) [46]. Overall, the results are in general agreement with previous  
 324 electrophysiological studies.

325 Our study is the first report of sound sensitivity through behavioural responses in  
 326 free-flying mosquitoes. We expected higher sensitivity compared with the  
 327 electrophysiological studies referred to above, since mosquitoes exhibit active hearing  
 328 [7,47] which could be triggered only by using appropriate behaviours (e.g. not tethered,  
 329 looking for males in the case of females). A possible reason in the case of males is that  
 330 the sound stimuli were not strictly natural; we played-back the sound of a large group of  
 331 swarming females (i.e. wide band tone) to test male sensitivity, which does not occur in the  
 332 field. Accordingly, we still expect a greater sensitivity for free-flying males exposed to  
 333 single-female sound (i.e. sharp-band tone corresponding to the sound of a single female),  
 334 as noted previously [16].

335

### 336 **Number of males in swarms**

337 In order to predict the sound level of swarms that have more males than the ones that we  
 338 established under laboratory conditions, we need to know the range of number of males in  
 339 field swarms. Few studies have investigated the range in numbers of males in mosquito  
 340 swarms; in Benin, *An. coluzzii* male swarms were typically composed of tens to thousands  
 341 of males, with a median of ~ 300 males [31], and in the area of our field study, single  
 342 sweep-net samples of *An. coluzzii* swarms caught a median of 200 males and a quarter of  
 343 the samples contained 500–2,500 males [48], indicating the likelihood that there are far  
 344 more males in the swarm than these estimates, as many as 10,000 males in a swarm  
 345 (pers. com. Diabaté). We have observed that larger swarms occur in areas and times of  
 346 year with higher population density; i.e. in an irrigated rice growing area during the wet  
 347 season swarms are numerically and spatially large, while in non-irrigated areas during  
 348 drier periods, swarms are regularly composed of 20-30 individuals at their peak [34].

349 The 70-male swarm used for the laboratory assay is, therefore, realistic, but  
 350 relatively small compared to the variation observed in the field, and the hearing range  
 351 prediction based on a 300-male swarm may be considered a typical case. Figure 5 shows  
 352 that a 300-male swarm cannot be heard by females even at a distance of 1 m. The same  
 353 is true for a 1,500-male swarm; we predicted no response from females at  $0.7 \pm 0.2$  m and  
 354 likely up to  $0.2 \pm 0.1$  m.

355 For the very largest swarms, the hearing distance threshold is greater than the  
 356 radius of the swarm elicited under laboratory condition. Since thousands of males in a  
 357 swarm is possible, it is useful to consider the relationship between the number of males in  
 358 a swarm and its dimension. For these large swarms, are their dimension altered by size?  
 359 and does their radius exceed the maximum hearing distance?

360

## Swarm radius as a function of number of males

The acoustic prediction results (Figure 5) show hearing range as a function of the number of males in the swarm. A swarm composed of more mosquitoes will produce a higher sound level, and so the distance at which it is audible will increase, accordingly. However, this relationship only has a meaningful real-world impact on swarm localization if the audible distance increases faster than the swarm radius. If radius increases faster than the distance at which the aggregation is detectable, a female is likely to hear an individual male swarming at the edge of the swarm sooner or more loudly than the swarm as a whole, because particle velocity increases rapidly at close-range of an individual mosquito. For this reason, information on how a swarm radius changes with the number of males is important for the interpretation of our results.

Several studies have investigated qualities of mosquito swarms e.g., the relationship between the marker size and swarm dimension [25,29,45], between the number of males and the marker size [29] or the marker type [30]. In one of our previous studies the relationship between the number of males and the swarm dimension, given a visual marker, was quantitatively measured [34]. *Anopheles gambiae* s.l. swarms composed of 10 to 50 males in Mali were observed to conform to a bell-shaped distribution of male density over the swarm centre, with a rapid decrease in the number of individuals with distance to the swarm centroid (20% of the swarm's individuals were within a radius of 20 cm of the centre, ~70-90% within 40 cm, 98% within 1 m). Thus, the first effect of increasing the number of males in the swarm was to increase male density in the swarm centre and not throughout the entire volume of the swarm.

Figure S4 uses the data of five swarms of *An. coluzzii* and seven swarms of *An. gambiae* s.s. from [34] to predict swarm radius as a function of the total number of males and of two 'layers' of a swarm (50% most centred or 95% most centred males), with a random intercept and slope model to predict the swarm radius of bigger swarms up to the



order of thousands. We consider here the swarm radius as defined by the sphere which centre is the swarm centroid and which encompasses 95% of the males nearest this point. The results on *An. coluzzii* are consistent with observations of swarms with thousands of males as being usually  $< 1$  m in radius [30]. For *An. coluzzii*, the predicted mean radius is  $0.5 \pm 0.1$  m for 95% of 1,000 swarming males ( $0.20 \pm 0.05$  m for 50% of them) and  $0.6 \pm 0.1$  m for 95% of 10,000 males ( $0.21 \pm 0.05$  m for 50% of them), representing a steep increase in density of swarming males, especially in the swarm centre (Figure S4). The swarm radius of an *An. gambiae* s.s. swarm is slightly larger for small swarms, but the predicted radius for large swarms is much larger (Figure S4).

In Figure 5, the 95%-male swarm radius of both species are superimposed over the hearing ranges of females as a function of the number of males in a swarm. To be heard at long-range, by definition, a female should be outside the swarm, i.e. the white area above the two swarm-radius lines is the only possible 'hearing-area', which is relatively small for *An. coluzzii* and absent for *An. gambiae*. However, since the hearing threshold is expected to be closer to the green area than to the red area (see Result section), it is unlikely that a female can hear a swarm before she hears a male located on the swarm edge, even for dense swarms with high numbers of males. The prediction has to be taken with caution for the greatest number of males.

405

#### 406 **Long-range hearing does not contribute to conspecific mating**

First, species-specific cues of swarm sound were found to be very weak (Figure S2). Second, our behavioural assay did not show any species-specific responses in *An. coluzzii* females to the swarming sound of *An. coluzzii* or *An. gambiae* s.s. males. Third, following the conclusion of the previous section, we can reject the idea that females use the sound emanating from a swarm to determine whether to avoid entering the swarm of the wrong species, or to join the swarm of the same species, because the female will not hear the



413 swarm before she comes into close proximity of numerous males at the periphery of the  
414 swarm.

415           Swarm localization by females is much more likely to be due to responding in the  
416 same way to environmental cues as their male counterparts, thereby enhancing the  
417 likelihood of encountering con-specific males. It is also possible that encounters are partly  
418 or entirely random, especially when swarms are numerous [26]. On the other hand,  
419 females may use the close-range sound of a chasing male to avoid being inseminated by  
420 the wrong species [4], however, we can eliminate the possibility that long-range hearing  
421 cues ensure assortative mating in *An. gambiae* s.l. and focus on other cues such as vision  
422 [29] or olfaction [49,50] in future research.

423

## 424 **Long-range hearing in mosquito communication**

425 This study presents data and analyses that reject the hypothesis that long range  
426 interspecific acoustic communication in both sexes of *Anopheles* mosquitoes occurs  
427 before mating and insemination. Indeed, to our knowledge, male swarms are the only  
428 serious candidate source of sound, for inter-mosquito acoustic communication at long-  
429 range, which is loud enough and which can fit the tuning of the mosquito organs. Although  
430 males are more sensitive to sound than females [17], they are less likely to respond to  
431 male swarm sound because their hearing organ is not tuned to male wingbeat frequencies,  
432 unlike females.

433           This study does not eliminate the hypothesis that long-range hearing can be used  
434 for host location [22,10] or for predator avoidance [20], providing the prey/predator sound  
435 is loud enough and tuned to mosquito hearing.

436

## 437 **Limitations of the experimental design**

438 The main limit of our experimental paradigm is that we used swarming females to test their  
439 response to male-swarm sound (see STAR\*Methods, section ‘Experiment paradigm’). This  
440 means that when females were exposed to the swarm sound, they were above a swarm  
441 marker, while in the field they would have been on their way to the marker where the  
442 males swarm. This may have induced females to continue swarming over the marker  
443 without altering their behaviour when male sound was played-back, effectively waiting for  
444 males to approach the marker. However, we monitored a large number of variables (flight  
445 velocities, positions and wingbeat frequency changes), so it is unlikely that we overlooked  
446 any female reaction to sound and unlikely that females would not respond if they could  
447 hear a male sound.

448

## 449 **ACKNOWLEDGMENTS**

450 David Sanou (for swarm location in Bama), Natalie Morley (insect rearing in NRI), Dr Paul  
451 Luizard (proof-reading of some acoustic equations), Stephen Young for discussion about  
452 statistics, Greg Smith from IAC Acoustics (for sharing tips on room acoustic). This work is  
453 supported by ANR JCJC-15-CE35-0001-01. Opinions, findings, conclusions, and  
454 recommendations expressed in this publication are those of the author and do not  
455 necessarily reflect the views of the USDA. The USDA is an equal opportunity provider and  
456 employer.

457

## 458 **AUTHOR CONTRIBUTIONS**

459 Conceptualization LF, GG and OR; Methodology LF and GG; Software LF; Formal  
460 Analysis LF; Investigation LF; Resources GG, OR, LF and NM; Data Curation LF; Writing  
461 – Original Draft LF and GG; Writing – Review & Editing OR and NM; Visualization LF;  
462 Supervision GG and OR; Funding Acquisition OR, GG;

463

## 464 **DECLARATION OF INTERESTS**

465 The authors declare no conflict of interest.

466

## 467 **FIGURE LEGENDS**

468

### 469 **Figure 1. Soundproof chamber setup for recording sound and video of mosquito** 470 **behaviour**

471 Bird's-eye and side views of soundproof chamber. Two IR-sensitive cameras fitted with IR  
472 pass filters tracked flying mosquitoes as black silhouettes against evenly lit IR-  
473 background. Separate lighting system provided gradual semi-natural dusk visible to  
474 mosquitoes, consisting of dispersed dim white lights on ceiling and 'sunset' lighting below  
475 horizon (opaque wall ~40 cm tall). A microphone recorded flight sounds of mosquitoes  
476 swarming directly above black swarm marker. A thermocouple (85 cm above ground level)  
477 recorded temperature at ~ mean swarm height. Differences between setups for the two  
478 species was necessary to accommodate species-specific differences in positioning of  
479 swarming flight in relation to swarm marker [29].

480 (A) Setup to record sound and flight of *Anopheles coluzzii*, for sound stimulus recording  
481 and behavioural experiment. A speaker located behind IR-illuminated thin-cotton sheet,  
482 outside net enclosure played back sound stimuli.

483 (B) Setup to record sound of *Anopheles gambiae* s.s., for sound stimulus recording only.

484

### 485 **Figure 2. Flight and sound responses of females and males to sound stimuli**

486 Female (red) and male (blue) flight-characteristics and wingbeat-frequencies before,  
487 during and after playback of male (blue rectangle) or female (red rectangle) sound stimuli.

488 (A) Probability distribution of distance between a female and the speaker during sound  
 489 stimulus playback; 95% of distances were between 72 cm and 113 cm, with a mean and  
 490 median of 94 cm. This distance interval was used to estimate the uncertainties of the  
 491 acoustic prediction in Table 2 and Figure 5.

492 (B) *An. coluzzii* response to highest sound-level *An. coluzzii* and *An. gambiae* sound-  
 493 stimulus over 27 s of experiment. Stimulus was played-back 10 s from beginning of flight  
 494 recording and lasted 7 s (red or blue rectangular shading). First five rows show flight  
 495 parameters (relative 'XYZ' position, plus linear and angular flight speeds). 'Z' dimension  
 496 represents relative distance to the speaker (located 0.9 m from Z=0). Last row shows  
 497 mean wingbeat frequency (WBF) of 1<sup>st</sup> harmonic. Darkest coloured lines represent running  
 498 median, darkest areas represent second and third quartiles and light areas represent the  
 499 90<sup>th</sup> percentile of data. Distribution of flight coordinates and velocities were recorded for  
 500 149 female tracks and 104 male tracks, and the WBF distribution plot is based on mean  
 501 WBFs over the number of mosquitoes per fly group (100 female-groups and 61 male-  
 502 groups). No clear apparent response was observed in females, whereas for males, linear  
 503 and angular speed and wingbeat frequency clearly increased in response to the sound  
 504 stimulus onset, plus a slight tendency to increase the flight height was evident.

505 (C) Same as B (with the exception of the spectrogram), but with a single example per plot.  
 506 First row shows spectrograms of sound recordings before, during and after the sound  
 507 stimulus. The colour gradient represents the sound level given a frequency and a time (the  
 508 darker the colour, the louder the frequency). Spectrogram in the first column displays a live  
 509 *An. coluzzii* female exposed to *An. coluzzii* male sound between 10th and 17th s (Video  
 510 S1), while the spectrogram in the second column displays a live *An. coluzzii* male exposed  
 511 to the two first-harmonics of the *An. gambiae* female sound (Video S2). Periodic flight  
 512 pattern, typical of swarming behaviour, is evident for males and females in 'XYZ' plots.

513

514 **Figure 3. Steps to evaluate the distance a female mosquito can detect the sound of**  
 515 **an *An. coluzzii* male swarm of a given number of individuals.**

516 This schematic explanation shows how methodologies from behavioural assay  
 517 ('measurements') and acoustic theory ('predictions') were employed in this study (case of  
 518 *An. coluzzii* sound stimuli). The same procedure was repeated with sound stimuli of *An.*  
 519 *gambiae* s.s. and the reciprocal experiment was performed with males exposed to sound  
 520 stimuli of a female-swarm for both species.

521 (A) First, the reference stimulus (sound of 70 males swarming) was recorded at 0.9 m from  
 522 the male swarm, producing a sound pressure level of 20 dB SPL.

523 (B) Second, this stimulus was played-back to 1-5 station-keeping free-flying female(s) at  
 524 four different sound levels (20, 25, 36 and 48 dB SPL) as measured at the mean females'  
 525 distance to the speaker (see Figure S3). Only the loudest stimulus produced a response in  
 526 females.

527 (C) Third, assuming the swarm sound emitted from the speaker to be a point source, and  
 528 given the natural sound level of a 70-male swarm ( $L_M$ ) at a distance of 0.9 m ( $r_{ref}$ ), we can  
 529 compute the natural distance to a similar swarm corresponding to the other three sound  
 530 levels (see STAR\*Methods section 'Formulae between sound level and distance').

531 (D) Fourth, the effect of multiplying the number of swarming males per N over the female  
 532 hearing distance is predicted (see STAR\*Methods section 'Formula relating hearing  
 533 distance and number of individuals in the swarm').

534

535 **Figure 4. Results of behavioural experiment**

536 One flight parameter (maximum linear speed difference, 1<sup>st</sup> subplot row) and one acoustic  
 537 parameter (maximum wingbeat frequency difference, 2<sup>nd</sup> subplot row) were extracted from  
 538 flight tracking and from wing-flapping sound for statistical analyses of female data (left

539 subplot column) and male data (right subplot column). 'Zero' (green dashed line) means  
540 there was no difference in the metric before and during the sound stimulus.

541 Boxplots of the parameters show the median, 2<sup>nd</sup> and 3<sup>rd</sup> quartiles. Outliers shown as  
542 diamond shapes are outside the interval  $[Q1 - 1.5 * IQD, Q3 + 1.5 * IQD]$  which shows as  
543 whiskers (Q1 = first quartile; Q3 = third quartile and IQD = interquartile distance). The  
544 black disk in each distribution shows the mean and standard error.

545 Two independent types of statistical tests were performed. Stepwise removal of terms was  
546 used for model selection, followed by likelihood ratio tests (orange text) [54]. An additional  
547 one-sample t-test with BF-correction for multiple comparisons was performed  
548 independently for each distribution to measure significance of the mean to zero value  
549 (dashed green lines).

550 (A) Female *An. coluzzii* responses to *An. coluzzii* male-swarm sounds at four SPLs. For  
551 the parameter related to linear speed, there was an effect of SPL (LRT  $\chi^2=4.34$ ,  $p=0.037$ )  
552 with a significant BH-corrected one-sample t-test ( $t(22)=3.6$ ,  $p=0.0067$ , mean=0.04 m/s).

553 (B) Male *An. coluzzii* responses to *An. gambiae* female-swarm sounds at four SPLs. For  
554 the maximum wingbeat frequency, there was a strong effect of the SPL (LRT  $\chi^2=18.87$ ,  $p$   
555  $< 0.001$ ), with a highly significant one-sample t-test for the 45 dB SPL distribution (one-  
556 sample  $t(17)=5.45$ , BH-corrected  $p<0.001$ , mean=36 Hz). Before the sound stimulus the  
557 mean male wingbeat frequency was 803 Hz.

558

559 **Figure 5. Estimated hearing-distance and swarm radius as a function of the number**  
560 **of males in the swarm**

561 Green area covers the minimal response range, while red area indicates the minimal non-  
562 response range of a female to male swarm sound from both species, as a function of the  
563 number of males in a given swarm (X-axis) and the distance to the swarm centre (Y-axis).

564 These areas are deducted from our behavioural results showing a response to 48 dB SPL  
 565 stimulus (green-to-white boundary) and the no-response 37 dB SPL stimulus (red-to-white  
 566 boundary), with their 95% confidence interval (dashed lines). The swarm is assumed to be  
 567 a point source in the model and only the far-field component of the particle velocity is  
 568 considered (see STAR\*Methods section 'Acoustic assumptions and formulae'): above 0.15  
 569 cm (black dotted line), the near-field component of the particle velocity is negligible (< 1  
 570 dB); below 15 cm the smaller the distance, the less linear the relationship between  
 571 distance and number of males is (i.e. the hearing distance should be higher than shown on  
 572 this graph). The light and dark blue lines, along with their 95% CI, represent the estimated  
 573 mean swarm radius of 95% of swarming males (see Figure S4, data from [34]).

## 574 TABLES

575

| Subjects exposed to sound stimuli | Sound stimuli    |                                |                     |                     |                                                                    |                                                                                                                                          |
|-----------------------------------|------------------|--------------------------------|---------------------|---------------------|--------------------------------------------------------------------|------------------------------------------------------------------------------------------------------------------------------------------|
| Species and sex                   | Sex              | Number of swarming individuals | Species             | Number of harmonics | Sound level                                                        |                                                                                                                                          |
|                                   |                  |                                |                     |                     | Played-back gain of 50Hz-smooth 1 <sup>st</sup> -harmonics         | SPL measurement of the two 1/3-octave bands closest to the 1 <sup>st</sup> harmonic (dB SPL) at fixed distances from the speaker (0.9 m) |
| NA                                | Silence playback |                                |                     | NA                  | 6.9±0.3                                                            |                                                                                                                                          |
| <i>An. coluzzii</i> female        | Male             | Group (~70)                    | <i>An. coluzzii</i> | all                 | L <sub>M</sub> , related to natural SPL 90cm away from the speaker | 20±3                                                                                                                                     |
|                                   |                  |                                |                     |                     | L <sub>M</sub> +6dB                                                | 26±3                                                                                                                                     |
|                                   |                  |                                |                     |                     | L <sub>M</sub> +16dB                                               | 36±3                                                                                                                                     |
|                                   |                  |                                |                     |                     | L <sub>M</sub> +28dB                                               | 48±3                                                                                                                                     |
|                                   |                  | Group (~30)                    | <i>An. gambiae</i>  |                     | L <sub>M</sub>                                                     | 20±3                                                                                                                                     |
|                                   |                  |                                |                     |                     | L <sub>M</sub> +6dB                                                | 25±3                                                                                                                                     |
|                                   |                  |                                |                     |                     | L <sub>M</sub> +16dB                                               | 36±3                                                                                                                                     |
|                                   |                  |                                |                     |                     | L <sub>M</sub> +28dB                                               | 48±3                                                                                                                                     |
| <i>An. coluzzii</i> male          | Female           | Group (~30)                    | <i>An. coluzzii</i> | 2                   | L <sub>F</sub> , related to natural SPL 90cm away from the speaker | 17±3                                                                                                                                     |
|                                   |                  |                                |                     |                     | L <sub>F</sub> +6dB                                                | 23±3                                                                                                                                     |
|                                   |                  |                                |                     |                     | L <sub>F</sub> +16dB                                               | 33±3                                                                                                                                     |
|                                   |                  |                                |                     |                     | L <sub>F</sub> +28dB                                               | 45±3                                                                                                                                     |
|                                   |                  | Group (~4)                     | <i>An. gambiae</i>  |                     | L <sub>F</sub>                                                     | 16±3                                                                                                                                     |
|                                   |                  |                                |                     |                     | L <sub>F</sub> +6dB                                                | 22±3                                                                                                                                     |
|                                   |                  |                                |                     |                     | L <sub>F</sub> +16dB                                               | 32±3                                                                                                                                     |
|                                   |                  |                                |                     |                     | L <sub>F</sub> +28dB                                               | 44±3                                                                                                                                     |

576

### 577 Table 1. Description of stimulus loudness at fixed distances from the speaker

578 This table gives the sound level of all played-back sound stimuli at fixed distances to the  
579 speaker, according to two different approaches. The first is the relative signal gain added  
580 to the played-back sound, ranging from +0 dB to +28 dB, with 0 dB relative to the natural  
581 sound level 0.9 m away from either a 70-male *An. coluzzii* swarm (L<sub>M</sub>) or a 30-female *An.*  
582 *coluzzii* swarm (L<sub>F</sub>) (see STAR\*Methods section ‘Generation of sound stimuli’ for the



583 calculation of  $L_M$  and  $L_F$ ). The gain of played-back sound of the *An. gambiae* swarm sound  
 584 stimuli were corrected to be the same as that of the *An. coluzzii* swarm, to balance the  
 585 different number of mosquitoes in the swarms of each species. The second approach to  
 586 describe the sound level is to measure a calibrated sound pressure level (SPL ref 20  $\mu$ Pa)  
 587 of the played-back sound stimulus at the mosquito's mean location in the frequency range  
 588 of the opposite-sex's harmonics audible by the mosquito (see STAR\*Methods section  
 589 'Wingbeat parameter extraction from flight sound'). SPL errors were estimated using  
 590 minimum and maximum sound pressure levels over time.

591

| Index | SPL at oscillatory distances from female(s) to speaker due to swarming behaviour (room mode effect included) | Estimated distances between the female(s) and the sound-source image of a male swarm |                                                                  |                                 |                                  |                                  |
|-------|--------------------------------------------------------------------------------------------------------------|--------------------------------------------------------------------------------------|------------------------------------------------------------------|---------------------------------|----------------------------------|----------------------------------|
|       |                                                                                                              | $r_i$<br>(calculated from $L_i$ )                                                    | $r_{i,j}$ (calculated from $r_i$ )<br>j number of swarming males |                                 |                                  |                                  |
| i     | SPL (measured)<br>$L_i$ (dB)                                                                                 | 70-male swarm<br>$r_i$                                                               | 300-male swarm<br>$r_{i,300}$                                    | 1500-male swarm<br>$r_{i,1500}$ | 6,000-male swarm<br>$r_{i,6000}$ | 10,000-male swarm<br>$r_{i,10k}$ |
| ref   | 20 $\pm$ 3                                                                                                   | 0.9 $\pm$ 0.2 m<br>(recorded case)                                                   | 1.9 $\pm$ 0.4 m                                                  | 4.3 $\pm$ 1.0 m                 | 8 $\pm$ 2 m                      | 11 $\pm$ 5 m                     |
| 1     | 26 $\pm$ 3                                                                                                   | 0.5 $\pm$ 0.1 m                                                                      | 1.0 $\pm$ 0.2 m                                                  | 2.3 $\pm$ 0.5 m                 | 4.6 $\pm$ 1.0 m                  | 6 $\pm$ 3 m                      |
| 2     | 36 $\pm$ 3                                                                                                   | 15 $\pm$ 3 cm *<br>(37 dB SVL)                                                       | 0.3 $\pm$ 0.1 m                                                  | 0.7 $\pm$ 0.2 m                 | 1.4 $\pm$ 0.5 m                  | 1.8 $\pm$ 0.7 m                  |
| 3     | 48 $\pm$ 3                                                                                                   | 4 $\pm$ 1 cm *<br>(54 dB SVL)                                                        | 8 $\pm$ 2cm *<br>(51 dB SVL)                                     | 18 $\pm$ 4 cm *<br>(49 dB SVL)  | 0.4 $\pm$ 0.1 m                  | 0.5 $\pm$ 0.2 m                  |

592

593 **Table 2. Schematic relationship between 'sound level' and 'distance' for *An. coluzzii***  
 594 **sound stimuli**

595 Table shows estimated distances from the female(s) to the sound-source image of male-  
 596 swarm sound, played-back 0.9 m from the centre of the females' swarming area. SPLs  
 597 were computed from the calibrated SPL measurements (ref 20  $\mu$ Pa) of the two nearest  
 598 third-octave bands to the wingbeat frequency's first-harmonic. SPL errors were computed  
 599 by taking into account the oscillating distance between the female(s) and the speaker due  
 600 to their swarming behaviour above the visual marker (see Figure 2 and STAR\*Methods

section ‘Sound pressure level’). The distances  $r_i$  from the female to the sound-source image of the 70-male swarm sound-stimuli were computed from an acoustic-propagation formulae using  $L_i$  and  $r_{ref}$  (see STAR\*Methods equation 6) and the errors were directly derived from SPL errors. The equivalent distance  $r_{i,j}$  for a j-male swarm, to result in the same sound pressure level  $L_i$ , was extrapolated from  $r_i$  using another acoustic formula (see STAR\*Methods equation 7). The asterisk (\*) means that the distance should be greater than indicated or the sound particle-velocity level (SVL) should be greater than the SPL as indicated (see STAR\*Methods section ‘Relationship between particle-velocity and pressure levels’). The SPL measurements of *An. gambiae* s.s. sound stimuli are reported in Figure S3; they were close to values for *An. coluzzii*, resulting in similar estimated distances between the female(s) and the sound-source image of a male swarm.

612

613

## 614 STAR\*METHODS

## 615 CONTACT FOR REAGENT AND RESOURCE SHARING

616 Further information and requests for resources and reagents should be directed to and will  
617 be fulfilled by the Lead Contact, Prof. Gabriella Gibson (g.gibson@gre.ac.uk).

618

## 619 KEY RESOURCES TABLE

| REAGENT or RESOURCE.                   | SOURCE                                                                                                                                | IDENTIFIER |
|----------------------------------------|---------------------------------------------------------------------------------------------------------------------------------------|------------|
| Experimental Models: Organisms/Strains |                                                                                                                                       |            |
| <i>Anopheles coluzzii</i>              | Institut de Recherche des Sciences de la Santé, Bobo Dioulasso, Burkina Faso. The larvae were collected in Bama, Burkina Faso in 2017 | G. Gibson  |

|                                                              |                                                                                                                                           |                                                                                                                          |
|--------------------------------------------------------------|-------------------------------------------------------------------------------------------------------------------------------------------|--------------------------------------------------------------------------------------------------------------------------|
| <i>Anopheles gambiae</i> s.s.                                | Institut de Recherche des Sciences de la Santé, Bobo Dioulasso, Burkina Faso. The larvae were collected in Soumosso, Burkina Faso in 2015 | G. Gibson                                                                                                                |
| Software and Algorithms                                      |                                                                                                                                           |                                                                                                                          |
| MATLAB                                                       | Mathworks                                                                                                                                 | R2017a (maci64)                                                                                                          |
| Audacity                                                     | audacityteam.org                                                                                                                          | 2.2.1 (Windows), 2.1.1 (Mac OS)                                                                                          |
| Pro Tools First                                              | Avid Technology, Inc                                                                                                                      | 12.8                                                                                                                     |
| Trackit (mosquito flight tracking)                           | SciTrackS GmbH, Bertschikon, Switzerland                                                                                                  | Trackit 3D v. 2.0                                                                                                        |
| Custom audio-video code for parameter-extraction (Matlab)    | This study                                                                                                                                | <a href="http://dx.doi.org/10.17632/hn3nv7wxpk.1">http://dx.doi.org/10.17632/hn3nv7wxpk.1</a>                            |
| Custom statistics code                                       | This study                                                                                                                                | <a href="http://dx.doi.org/10.17632/hn3nv7wxpk.1">http://dx.doi.org/10.17632/hn3nv7wxpk.1</a>                            |
| Temperature logger software                                  | Omega Engineering, Inc                                                                                                                    | HH506RA                                                                                                                  |
| R                                                            | The R Foundation                                                                                                                          | 3.5.3                                                                                                                    |
| Dim light programmer                                         | Dimmer-leds.fr                                                                                                                            | PLeD                                                                                                                     |
| Windows (for lab recording)                                  | Microsoft Corporation, Redmond, WA, USA                                                                                                   | Windows 7                                                                                                                |
| MacOS (field recording)                                      | Apple, Inc.                                                                                                                               | 10.12.6                                                                                                                  |
| Other                                                        |                                                                                                                                           |                                                                                                                          |
| Sound stimuli of swarming mosquito <i>Anopheles coluzzii</i> | This paper                                                                                                                                | Multimedia files included in the submission, modified as described in STAR*Methods section 'Generation of sound stimuli' |
| Speaker for sound stimuli                                    | Genelec                                                                                                                                   | 8010A                                                                                                                    |
| Sound card (lab)                                             | Scarlett                                                                                                                                  | 18i8                                                                                                                     |
| Sound card (field)                                           | Scarlett                                                                                                                                  | Solo                                                                                                                     |
| Microphone                                                   | Sennheiser                                                                                                                                | MKH 60-48                                                                                                                |
| Sound pressure level meter                                   | Casella                                                                                                                                   | CEL633C1, Class 1                                                                                                        |
| 2 Cameras, wavelength peak sensitivity 840 nm                | Basler                                                                                                                                    | ace A640-120gm                                                                                                           |
| 2 camera lenses                                              | Computar                                                                                                                                  | T3Z3510CS                                                                                                                |
| 2 Infra-red filters (below ~840nm)                           | Instrument Plastics Ltd UK                                                                                                                | G. Gibson                                                                                                                |
| 10 Infra-red lights                                          | Raytec                                                                                                                                    | RM25-F-120 RAYMAX 25 FUSION                                                                                              |
| 'Clapper-board' to synchronise video and audio signals.      | Bespoke unit produced in-house.                                                                                                           | G. Gibson                                                                                                                |

|                                                                             |                        |                                                                                                                                                                                                          |
|-----------------------------------------------------------------------------|------------------------|----------------------------------------------------------------------------------------------------------------------------------------------------------------------------------------------------------|
| Mosquito net                                                                | NATURO                 | Outdoor Double Bed Mosquito Net Canopy                                                                                                                                                                   |
| Custom Day light                                                            | Dimmer-LEDs.fr         | ~400 LEDs 5630 (2400 lumen/m) at 10cm from and directed to the white ceiling.<br>Plugged to HMCO FLEXIBLE DIMMER.                                                                                        |
| Custom Sunset/Sunrise light                                                 | Dimmer-LEDs.fr         | ~200 LEDs 5630 (2400 lumen/m) directed to the ceiling, behind a 50cm-high black wall (horizon), the rest being covered by a white thin cotton bedsheet (sunset sky).<br>Plugged to HMCO FLEXIBLE DIMMER. |
| Soundproof chamber covered with white cotton bedsheets on walls and ceiling | IAC Acoustics Division | Natural Resources Institute, Univ. of Greenwich                                                                                                                                                          |
| Thermocouple (temperature sensor)                                           | Omega Engineering, Inc | Type T, IEC 584 Class 1                                                                                                                                                                                  |
| Temperature logger                                                          | Omega Engineering, Inc | HH506RA                                                                                                                                                                                                  |

620

## 621 EXPERIMENTAL MODEL AND SUBJECT DETAILS

622 All experiments were performed with two sibling species in the *Anopheles gambiae* s.l.  
623 Giles species complex: *An. gambiae* s.s. Giles and *An. coluzzii* Coetzee & Wilkerson.  
624 Colonies of the two species were established at the Natural Resources Institute (NRI),  
625 University of Greenwich (UK) from eggs provided by the Institut de Recherche en  
626 Sciences de la Santé (IRSS), Burkina Faso. *Anopheles coluzzii* eggs were obtained from a  
627 colony established in 2017 from wild gravid females collected from inhabited human  
628 dwellings in Bama, Burkina Faso (11°23'14"N, 4°24'42"W). *Anopheles gambiae* s.s. eggs  
629 were obtained from a colony established at IRSS in 2008 and renewed with wild material  
630 in 2015 from Soumouso, Burkina Faso (11°00'46"N, 4°02'45"W). Females were identified  
631 to species level by PCR [51]. The NRI colonies were kept in environmentally controlled  
632 laboratory rooms with a 12h:12h light:dark cycle, >60% relative humidity and ~24-26°C.  
633 Adults were kept in wire cube cages (~40 cm sides) covered with cotton netting and fed a  
634 solution of 10% sucrose in an isotonic saline *ad libitum*. Females were blood-fed every 4  
635 weeks by a human volunteer (GG). Approximately 30 females per generation laid eggs on  
636 disks of damp filter paper, and the eggs were then distributed between two larval plastic

637 breeding trays filled with ~1 L of isotonic saline. Four days after egg hatching, four groups  
638 of 90 larvae of all sizes were transferred to four fresh breeding trays filled with isotonic  
639 saline. Larvae were fed Tetramin® fish-flakes and rice powder. Pupae were distributed  
640 between two netting cages for emergence. Adult males and females were separated < 12h  
641 post-emergence to ensure females were not inseminated. Adult mosquitoes used for  
642 experiments were fed 10%-sucrose in isotonic saline *ad libitum*.

643

## 644 **METHOD DETAILS**

### 645 **Experimental paradigm**

#### 646 *Principle*

647 It is known that male mosquitoes are attracted to a source of female flight tones, either the  
648 sound of a live female or a speaker emitting female flight tones. Males and females are  
649 both tuned to the ‘difference-tone’ between their respective wingbeat frequencies, which  
650 provides a relatively robust means of locating each other in mating swarms [1-4,6,8,9,23-  
651 25]. This observation raises the hypothesis that females may be attracted to the sound of  
652 male swarms, and if so, might they hear larger swarms from a long distance (> 1m)? [34].

653 To test this possibility, instead of changing the distance between the test female  
654 and the male swarm, we used a range of sound levels to mimic a range of distances  
655 between a female and swarming males; we altered the apparent distance between the  
656 female and the sound-source ‘image’ of the played-back swarm by changing the sound  
657 level produced by the speaker. STAR\*Methods section ‘Formulae between sound level  
658 and distance’ explains how to predict apparent distances between the receiver and the  
659 sound source ‘image’ based on sound pressure levels. By ‘image’, we mean that, while the  
660 distance from the female to the speaker was always the same ( $\pm 0.2$  m), the sound levels  
661 were adjusted to mimic the loudness of the sound pressure of a male swarm at specific

distances between the female and a played-back recording of a male swarm of a given number of individuals.

### ***Control of distance between live mosquito and playback speaker***

To establish fixed distances between the sound source and free-flying females, we exploited female swarming behaviour; in the absence of male mosquitoes uninseminated females swarm over a floor marker in flight patterns similar to those of conspecific males. Accordingly, we constructed a flight arena that provided visual cues that stimulated females to fly in elliptical loops over a stationary swarm marker, effectively confining them within a limited area of the flight arena [25,27-29], which enabled us to assess whether or not a female responded to the sound stimulus of the playback of swarming males at a controlled sound level.

The speaker that reproduced the males' swarming flight tones was placed 0.9 m from the centre of the swarm marker. A few females (< 15) at a time were released in the flight arena, and periodically 1 to 5 females were stimulated by the visual characteristics of the marker to switch from random flight to swarming flight. Their flight positions were recorded by 3D-tracking Trackit Software (Figure 2B, Figure 2C) which enabled us to determine the distance between a mosquito and the speaker emitting mosquito sound ( $0.9 \pm 0.2$  m ,95%-CI, Figure 2A).

### ***Choice of species of test subjects and for sound stimuli***

We had no difficulty in triggering robust swarming behaviour in *An. coluzzii* males and females and in *An. gambiae* s.s. males, but it was difficult to obtain consistent results with *An. gambiae* s.s. females. For this reason and others given above, we focused on the response of *An. coluzzii* to sound stimuli. Overall, female responses to male flight sound were generally small, therefore, we conducted the reciprocal experiment with *An. coluzzii* males exposed to female-swarm sound, to confirm that the experimental protocol was valid (male responsiveness to female-swarm sound was robust), even if it was more

688 difficult to induce *An. gambiae* s.s. females to swarm (we recorded the sound of a swarm  
689 composed of 4 females a a time for *An. gambiae* s.s., versus 30 females at a time for the  
690 *An. coluzzii*).

## 691 ***Experimental design***

692 For each replicate (one per day, August-September 2018), about fifteen 3-6 days-old  
693 uninseminated females were released the day prior to experiments at ~ 18h00 in the  
694 sound recording flight arena and left to fly freely until the end of the experiment.

695 At 15h00, after the ceiling lights had dimmed to the lowest intensity, the horizon  
696 light completed a 10 min dimming period and then was kept at a constant dim light  
697 intensity until the experiment was finished. Some females started flying in the soundproof  
698 chamber but did not swarm over the marker immediately. When at least one female  
699 started to swarm robustly over the marker, a first sequence of sound stimuli was played  
700 (see STAR\*Methods section 'Generating the different sound levels'). Each of the  
701 subsequent sequences were played immediately following the last if the previous  
702 female(s) was still swarming or as soon as at least one female started swarming. The  
703 experiment was ended when the maximum number of sequences (10) was reached or  
704 after 50 min of constant horizon light. Females were then collected and removed from the  
705 flight arena. A new group of ~15 mosquitoes were released in the soundproof chamber, to  
706 be used for a new replicate the next day.

707

## 708 **Recording environment**

### 709 ***Soundproof chamber***

710 Due to the low decibel level of mosquito flight tones, all experiments were conducted in a  
711 soundproof chamber to limit interference from external sounds. The chamber consisted of  
712 double-skin soundproof walls, ceiling and floor (L x W x H = 2.7 m x 1.9 m x 2.3 m), with  
713 carpet on the floor, semi-absorbent internal walls/ceiling and a layer of white cotton cloth



714 covering all surfaces, producing a reverberation time  $\leq 0.07$  s for frequencies above 200  
715 Hz (measurements conducted in empty room by IAC Acoustics, manufacturers).

716 Figure S5C displays the sound level per octave band when the soundproof  
717 chamber was silent (dashed lines). At low frequencies ( $<176$  Hz), the sound pressure level  
718 (SPL) was  $\geq 25$  dB (ref  $20\mu\text{Pa}$ ). Between 176 Hz (lower limit of the 250-Hz octave band)  
719 and 1.4 kHz (upper limit of the 1-kHz octave band), i.e. the frequency range within the *An.*  
720 *coluzzii* mosquito's response is the highest [3], the SPL was  $< 14$  dB, which is 8 dB less  
721 than the quietest sound stimulus used in the study.

## 722 ***Sound monitoring***

723 The wingbeats (aka, 'flight tones') of mosquitoes in the laboratory were recorded with a  
724 weatherproof microphone (Sennheiser MKH60; RF-condenser; super-cardioid polar  
725 pattern at 0.5-1 kHz, with amplitude decrease of  $> 15$  dB beyond  $90^\circ$  from the microphone  
726 head) directed toward the swarm location. The microphone was located at a distance of  
727 0.9 m from the centre of the swarm area (Figure 1).

## 728 ***Flight track recording***

729 The 3D flight trajectories of mosquitoes were captured at a sampling rate of 50 Hz with  
730 Trackit software (SciTrackS GmbH, Switzerland, [52]) running on a Windows7 computer.  
731 Two video cameras (Basler, ace A640-120gm) were fitted with wide-angle lenses  
732 (Computar, T3Z3510CS, 1/3" 3.5-10.5mm f1.0 Varifocal, Manual Iris) to maximise 3D  
733 volume of video-tracking. IR lighting enabled tracking system to detect flying mosquitoes  
734 as silhouettes against an IR-illuminated white back-wall made of a thin cotton sheet  
735 (Figure 1). The dual IR/white lighting system enabled constant bright IR light (invisible to  
736 mosquitoes) for video-tracking flying mosquitoes, while an independent lighting system  
737 controlled ambient light detected by mosquitoes to provide a smoothly controlled dusk. All  
738 immobile mosquitoes (i.e. at rest on surfaces in the field-of-view) were automatically



739 deleted. The 3D-flight trajectories were smoothed using a cubic spline interpolation at a  
740 sampling frequency of 200 Hz.

#### 741 ***Field recording***

742 Preliminary recordings of the flight sound of wild male *An. coluzzii* swarms in the area  
743 where our colony originated from (village VK5, Bama, Burkina Faso, 11°23'17.5"N  
744 4°24'27.0"W, October 2017) were used to study the signal-to-noise ratio of swarm sound  
745 in the field against local background noise. The swarm was spherical (~1 m diameter),  
746 centred ~3 m above the ground and was not apparently disturbed by our presence and  
747 produced sound at acceptable levels for recording. The swarm consisted of several  
748 thousands of *An. coluzzii* (estimated by eye, by LF, OR and experienced technical staff  
749 from the IRSS). The swarm's sound was recorded from various positions and distances;  
750 from tens of cm to 3 m away. The recordings were produced with an RF-condenser  
751 microphone (MKH 60 P48) plugged into a Scarlett Solo sound card, run by Audacity  
752 software on a Mac OSX.

753

#### 754 **Environmental conditions in soundproof chamber**

755 The swarming arena was designed to include the key environmental conditions and  
756 sensory cues known to control mating and swarming flight in the field. A large mosquito  
757 bed-net enclosure (L x W x H = 1.8 m x 1.7 m x 2 m) filling most of the soundproof  
758 chamber (Figure 1) enabled mosquitoes to fly freely in a volume 100 times greater than  
759 the volume covered by the swarming space.

#### 760 ***Light and visual cues***

761 Lighting was provided by an artificial-sunlight system to imitate natural daylight, sunrise  
762 and sunset (LED 5630, custom-built). Daylight lamps were arranged to mimic sunset  
763 lighting; a sharp horizon ~ 40 cm above the floor on one side of the room provided a

764 'sunset' feature and a gradually decreasing light intensity with increasing height above the  
765 floor (Figure 1).

766 The visually conspicuous matt-black swarm marker triggered swarming behaviour.  
767 The marker consisted of a circle of matt-black paper ( $\varnothing=30$  cm), placed > 30 cm away  
768 from the closest netting. The location and height of the swarm marker was arranged  
769 according to the swarming behaviour of each species in order to induce swarming flight at  
770 the same location in the room for the two species: therefore, the swarm marker for *An.*  
771 *gambiae* s.s. was raised by 6 cm and moved 0.8 m horizontally in the opposite direction of  
772 the dusk light, compared to the position of the *An. coluzzii* swarm marker (Figure 1), as  
773 previously reported [29]. The lighting system provided an artificial dusk; ceiling lights were  
774 dimmed over 30 min, while the horizon lights started to dim 10 min before the ceiling light  
775 turned off, whereupon the light intensity decreased gradually over 10 min and finally  
776 remained constant for 1 h to provide a constant very dim light intensity that favoured  
777 prolonged swarming flight during the experiments.

#### 778 ***Temperature monitoring***

779 The temperature was monitored by type-T thermocouples associated with an Omega  
780 HH506RA temperature logger (total measurement accuracy error of  $\pm 0.9$  °C). The chosen  
781 thermocouple was located on a room wall at a height of 85 cm from the floor. The 4  
782 recordings of the reference sound stimuli (two species, two sexes) were recorded at 28.0  
783 °C. The temperature mean and standard deviation of the behavioural assays were  
784  $28.0 \pm 0.3$  °C.

785

#### 786 **Generation of sound stimuli**

##### 787 ***Recording of the reference sound-stimuli***

788 Swarms of *An. coluzzii* females or males, and *An. gambiae* s.s. females or males were  
789 recorded in the soundproof chamber (Figure 1 and Figure S2). About 300 x 4-7 days-old

790 males or 1-4 x 2-6 days-old females were released in the swarming arena two days before  
791 the experiment to acclimatise before their flight sounds were recorded. The standard  
792 environmental conditions in the room were: 12h:12h light:dark cycle with a 1h artificial  
793 dawn/dusk transition in light intensity, 21-28°C and ~60-75% RH.

794 One recorded 7s-sequence was selected for each sex/species, which began ~10  
795 min after the first male/female started to swarm (Sound S1: *An. coluzzii* male swarm;  
796 Sound S2: *An. gambiae* s.s. male swarm; Sound S3: *An. coluzzii* female swarm; Sound  
797 S3: *An. gambiae* s.s. female swarm). The swarms were composed of 30-70 individuals  
798 (except for the *An. gambiae* s.s. female swarm: 4 individuals) flying in loops 0.3 m above  
799 the floor level with a horizontal diameter of 0.2 m. The sound amplitude was controlled by  
800 fading in at the sound start and fade out at the sound end, both over 1 s to avoid creating  
801 noise due to the signal truncation, and to make the stimulus more natural, i.e. mimicking  
802 the male swarm sound amplitude which continuously increases when the female gets  
803 closer to the swarm.

#### 804 **Reference sound-stimulus gain**

805 For each sex, the *An. coluzzii* swarm was the reference, and to balance the different  
806 number of individuals in the swarms of the two species, the *An. gambiae* s.s. swarm sound  
807 level was adjusted to that of *An. coluzzii* (based on the 50Hz-smoothed spectrum peak of  
808 the first harmonic, which is known to be important in mosquito hearing [3]). We took  
809 advantage of the high numbers of *An. coluzzii* mosquitoes that swarmed (70 males and 30  
810 females), which we did not achieve with *An. gambiae* s.s. (30 males and 4 females), even  
811 though it meant adjusting the sound level of *An. gambiae* s.s. sounds stimuli (see Figure  
812 S2).

813 To playback the stimuli at natural sound levels, we first played them back in the  
814 same room and at a distance to a speaker (Genelec 8010A) identical to the distance  
815 between the swarm and the microphone. Second, the gain was set to ensure the same

816 relative sound pressure level was used as during the reference swarm recording (based  
817 on the first harmonic amplitude peak from a 50Hz-smoothed spectrum, Figure S2). The  
818 same software and hardware settings were used (Audacity on Windows7, Soundcard  
819 Scarlett 18i8, microphone MKH 60) to monitor the sound as during its initial recording.

820 For each sex, the reference sound stimulus was used to generate the full range  
821 of stimuli, which only differed between species by their sound level. The gain settings,  
822 applied to have a natural sound level of a 70-male swarm or 30-female swarm 0.9 m away,  
823 served as the reference (see Table 1 for sound level values for each stimulus).

824 Figure S2 gives the sound spectrum of the swarm sounds used in the assays.  
825 They are harmonic sounds with a large frequency bandwidth. The female harmonics (from  
826 three times the fundamental frequency) were filtered out in order to free some spectral  
827 space for male wing beat tracking, which does not change the response to the sound  
828 stimuli since these higher harmonics are unlikely to be heard by these mosquitoes [3].

#### 829 *Generating the different sound levels*

830 In addition to the natural sound level of the reference sound stimulus (i.e., 70-male swarm  
831 or a 30-female swarm 0.9 m away), we generated three more stimuli for each species and  
832 each sex, to test the efficacy of sound levels over the range of the response possibilities,  
833 using Matlab (R2017a, The Mathworks Inc, Natick, USA) at a sample rate of 8 kHz / 24  
834 bits.

835 The additional gains applied to the natural-sound-level reference stimuli were  
836 computed using a criterion based on the maximum value of the first harmonic on a 50-Hz-  
837 smoothed sound spectrum: +6.0 dB, +16 dB and +28 dB compared to the reference sound  
838 stimuli (see Table 1 for measured SPL of each stimulus).

839 A high-pass filter was added to remove the electrical noise below the first  
840 harmonic (without removing any frequency component of the swarm sound). The eight  
841 stimulus sounds (two species x four sound levels) were combined sequentially with a 10 s

842 silence interval. Ten sequences were generated, each containing the four sounds ordered  
843 randomly.

#### 844 *Sound stimulus playback*

845 Recorded mosquito sounds were played-back from a speaker (Genelec 8010A) with its  
846 membrane located 57 cm above the floor, 15 cm from the back wall, and 0.9 m from the  
847 swarm marker (Figure 1). Both microphone and speaker were plugged into a Scarlett 18i8  
848 sound card running pro Tools First & Audacity on Windows 7.

849

## 850 **QUANTIFICATION AND STATISTICAL ANALYSIS**

### 851 **Response Parameters**

#### 852 *Wingbeat parameter extraction from flight sound*

853 Wingbeat frequency was tracked every 40 ms using a Fast Fourier Transform algorithm  
854 (256-ms FFT, Hanning-windowed). Since females and males do not have the same  
855 wingbeat frequency and we always played-back opposite-sex sound stimuli to individuals,  
856 we had to operate differently for each sex. For females, their fundamental wingbeat  
857 frequencies were tracked between 370 Hz and 660 Hz (given that the mean female  
858 wingbeat frequency without an added sound stimulus was 487 Hz) to avoid overlap with  
859 played-back wingbeat harmonics of swarming males (female wingbeat frequencies were  
860 always lower). For males, only the two first harmonics of female sound stimuli were  
861 played-back and then the male's third harmonic (3 x fundamental frequency) was tracked  
862 between 2190 and 2920 Hz (given that the mean male wingbeat frequency without sound  
863 stimulus was 803 Hz), since it is the lowest harmonic that does not overlap with the sound  
864 stimulus (example of spectrogram in Figure 2C). When several wingbeat frequencies were  
865 tracked due to the presence of several mosquitoes over the swarming marker, their  
866 wingbeat frequencies were averaged. Male harmonics were divided by three to get the  
867 fundamental frequency. Finally, a 3-point median filter was applied over time to reduce

868 wingbeat tracking error. Figure 2C gives an example of detected wingbeat frequencies of  
869 females and males while Figure 2B shows the distribution of the detected wingbeat  
870 frequency over time for all recordings.

871 The maximum wingbeat frequencies were automatically detected during the 7 s  
872 stimulus time interval, as well as during the 7 s segment just before stimulus onset and  
873 were subtracted since we are interested in the response difference between the ‘with  
874 sound’ stimulus and the ‘without sound’ stimulus.

### 875 *Position and speed parameter extraction from tracked flight trajectory*

876 The criteria used to include a tracked flight in the data analysis were: the mosquito was  
877 swarming over the marker for at least 1 s before and after the duration of the sound  
878 stimulus onset. Linear speed at time index  $n$  was calculated as the square root of the sum  
879 of the three square velocity components provided by the Trackit software, and the angular  
880 speed was computed as  $avel = \frac{\Delta\theta}{\Delta t}$ , where  $\Delta t = t_n - t_{n+1}$  is the duration between two  
881 consecutive time indexes  $n$  and  $n+1$ , and  $\Delta\theta$  is the turn angle defined as (equivalent to the  
882 definition in [53]):

$$avel = \arccos \frac{v_n \cdot v_{n+1}}{|v_n| \cdot |v_{n+1}|} \quad (1)$$

883 where  $v_n$  is the three-dimensional linear velocity vector of the mosquito at time index  $n$  and  
884  $|v_n|$  is its magnitude.

### 885 *Sound and video synchronization*

886 To synchronize sound and video data, a custom-made ‘clapper-board’ simultaneously  
887 switched off an IR led and a 3900-Hz bip sound (which cannot be heard by this species  
888 complex [3]). The IR light was located on the edge of the field of view where no mosquito  
889 was expected to swarm. The IR light was automatically tracked every 2 ms when the light  
890 was switched off (i.e. creating a dark silhouette) simultaneously with the sound. The 10-s  
891 bip sound was played-back before and after each stimulus sequence and manually  
892 switched off along with the IR light. The bip ‘offsets’ were detected manually on an 8 ms-

893 window spectrogram. Cumulative errors over time were controlled by using the ‘offset’ time  
894 before and after the stimulus sequence. Overall, the synchronization uncertainty was  $\pm 8$   
895 ms.

896

## 897 **Statistics**

898 We were not able to discriminate between mosquitoes from their wingbeat frequencies  
899 when swarming in a group, so for each sound parameter values were computed for the  
900 whole tested group of 1-5 females or of 1-6 males swarming at a time (distribution of  
901 tested-mosquito number in Figure S3). In contrast, flight location and velocities were first  
902 computed for each mosquito in the group, and then averaged over each group to form a  
903 replicate. For females exposed to male sound, a total of 10 to 12 replicates per sound level  
904 and species were tested, against a total of 9 to 10 replicates per sound level and species  
905 for males exposed to female sound. Each replicate was performed on a different day.

906         The sound and video response parameters were analysed using a Bayesian  
907 Linear-Mixed Model (*blmer* function, lme4 package, R). Stimulus sound levels and species  
908 were considered fixed effects and days,—for which replicates were performed— were  
909 considered random effects. Sex was considered separately. Stepwise removal of terms  
910 was used for model selection, followed by likelihood ratio tests. Term removals that  
911 significantly reduced explanatory power ( $p < 0.05$ ) were retained in the minimal adequate  
912 model [54]. An additional one-sample t-test (with BF-correction for multiple comparisons)  
913 was performed independently for each distribution to measure the significance of the mean  
914 to 0, which is the “no response” reference. All analyses were performed using R (version  
915 3.5.1).

916



## 917 **Sound pressure level (SPL)**

### 918 ***Measurement***

919 To compare the sound stimulus with previous studies on hearing sensitivity, SPLs were  
 920 measured at the females' swarming position with a sound meter (Casella, CEL633C1,  
 921 Class 1) set as follows: no octave weighting (i.e. dB Z); slow octave time-constant (IEC  
 922 61672-1: 2002); octave and third-octave bands; calibrated twice a day (CEL-120/1, Class  
 923 1, at 94 dB / 1 kHz) before and after each measurement. The reference pressure value  
 924 was 20  $\mu$ Pa. The minimum and maximum sound level values within each stimulus duration  
 925 were used to compute the mean and error of each measurement (Table 1). The speaker  
 926 and the software/soundcard gains were set to be the same as during the behavioural  
 927 experiment.

928 All SPLs reported in the paper take into account only the frequency bands that are  
 929 audible by mosquitoes, i.e. mostly the first-harmonic of the opposite sex [3]. They were  
 930 calculated as follows:  $10\log_{10}(10^{0.1L_{B1}} + 10^{0.1L_{B2}})$  where  $L_{B1}$  and  $L_{B2}$  are SPL  
 931 measurements in frequency bands B1 and B2; B1 and B2 are the third-octave bands  
 932 nearest the wingbeat frequency of the first-harmonics, i.e. 800 Hz and 1000 Hz for males  
 933 and 500 Hz and 630 Hz for females (see full third-octave level in Table 1 and Figure S5).  
 934 This method enabled us to compare our sound stimulus levels to pure sounds used in  
 935 previous studies and is closer to what mosquitoes actually hear.

### 936 ***Estimate of SPL errors at mosquito's location***

937 Three types of SPL errors were taken into account. The first is related to the time variation  
 938 of the sound stimulus levels and were between  $\pm 0.3$  dB and  $\pm 1$  dB, depending on the  
 939 stimulus considering maximum error (see Figure S2 for an example of stimulus RMS-  
 940 pressure-level along time).

941 The second source of error is related to acoustical interferences caused by room  
 942 boundaries. Up to this point, we have considered a free-field acoustic-propagation



943 hypothesis to simplify the problem. In a room, however, sound level can decrease  
 944 (destructive interference) or increase (constructive interference) independently of the  
 945 distance to the speaker. This effect was reduced by the semi-absorbent walls of the room,  
 946 but was still present because the room was not an anechoic chamber. Boundary-induced  
 947 ‘comb filtering’ was reduced by locating the speaker close to the wall, but acoustic room  
 948 modes were still present. We played-back the *An. coluzzii* male and female swarm  
 949 stimulus and measured the sound level in a 0.2 m diameter sphere around the expected  
 950 swarm centre. The maximum error was about  $\pm 1$  dB for the female sound stimulus and  $\pm 2$   
 951 dB for male swarm stimulus. We ignored any reverberation effect, as we estimated its  
 952 effect to  $< 0.4$  dB at 800 Hz, using an acoustic room model of the ratio of direct and  
 953 reverberant sound, given the reverberation times of the room provided by the soundproof  
 954 chamber designer (IAC Acoustics Ltd).

955         The last type of measurement uncertainty arises when the estimated sound level  
 956 should be estimated from the mosquito’s point of view. SPLs were measured at the  
 957 expected centre of the station-keeping swarm-flight of the mosquito. However, the  
 958 distance between the female and the speaker varies between 72 and 113 cm (95%-CI,  
 959 Figure 2A) due to the females’ swarming-flight pattern and sound level changes,  
 960 accordingly. We computed this error by considering the fluctuating distance between the  
 961 female mosquito and the speaker using equation 6.

962         Finally, using standard uncertainty-propagation theory, we calculated the total  
 963 error of sound pressure level  $L_i$  at the location of the female exposed to male sound,  
 964 resulting in a total error of  $\pm 3$  dB SPL for the SPL. This error is considered to be  
 965 conservative (at least 95%) and were used to interpret the results of the experiments. For  
 966 errors related to the difference between what we measured (sound pressure) and what  
 967 mosquitoes detect (particle velocity), see ‘Quantification and Statistical Analysis section’,  
 968 subsection ‘Physical sound quantities produced by a speaker and sensed by mosquitoes’.

969

## 970 **Acoustic assumptions and formulae**

### 971 *Acoustic assumptions for a swarm*

972 The density of a swarm is far greater in the centre than at the periphery [34] (Figure S4).  
 973 Therefore, for the purposes of this analysis, we considered the swarm to be a point source  
 974 that radiates spherically in all directions (neglecting the sound reflection on the ground or  
 975 any nearby object). This approximation can be used if the swarm radius remains relatively  
 976 small compared to the distance between the female and the swarm centre. Swarms can  
 977 be ovoid [29,34], but this is not an issue for our point-source assumption, because the oval  
 978 dimension was perpendicular to the female-to-swarm spatial axis, so each swarming male  
 979 equally contributed to the radiated swarm sound toward the female at long range.

### 980 *Relationship between particle-velocity and pressure levels*

981 We monitored the sound level of swarms by recording the sound pressure level (SPL),  
 982 while mosquito hearing organs are sensitive to particle velocity levels [52,13,14]. These  
 983 two quantities are equal only far from the sound source, so it is important to understand  
 984 how they are related to estimate the error when we are dealing with sources close to the  
 985 receiver.

986 For any distance  $r$  from the sound source (i.e. near-field, far-field and in-between)  
 987 at time  $t$ , the particle velocity  $v(r, t)$  can be expressed mathematically by two additive  
 988 terms; one for which the amplitude decreases with the inverse of distance (far-field  
 989 component), and another, for which its amplitude decreases with the inverse of the  
 990 distance squared (near-field component), while pressure  $p(r, t)$  is expressed by a unique  
 991 term for which the amplitude decreases with the inverse of distance [55]:

$$v(r, t) = \frac{1}{Z_{air}} \frac{1}{r} s\left(t - \frac{r}{c}\right) + \frac{c}{Z_{air}} \frac{1}{r^2} \int \left(t - \frac{r}{c}\right) dt \quad (2)$$

$$p(r, t) = \frac{1}{r} s\left(t - \frac{r}{c}\right) \quad (3)$$

$s\left(t - \frac{r}{c}\right)$  a progressive wave solution of the wave equation, bounded, moving at a speed  $c(28^\circ\text{C}) = 348 \text{ m}\cdot\text{s}^{-1}$ , at time  $t$  and position  $r$  from the sound source.  $Z_{air}(28^\circ\text{C}) = 408 \text{ N}\cdot\text{s}\cdot\text{m}^{-3}$  is the air impedance.

Considering a particular frequency (i.e. by choosing  $s(t - r/c) = \cos\left(2\pi f\left(t - \frac{r}{c}\right)\right)$

and averaging over a sound period by taking the root-mean square value (RMS), the RMS particle velocity and the RMS sound pressure can be related as follows for a point source radiating spherically [56]:

$$v_{RMS}(r) = \frac{p_{RMS}(r)}{Z_{air}} \sqrt{1 + \left(\frac{c}{2\pi fr}\right)^2} \quad (4)$$

The SPL  $L \stackrel{\text{def}}{=} 20\log_{10}(p_{RMS}/p_0)$  and the associated particle-velocity level  $L_v = 20\log_{10}(v_{RMS} Z_{air}/p_0)$  with  $p_0 = 2.0 \times 10^{-5} \text{ Pa}$ , sea-level RMS atmospheric pressure) can be calculated as follows:

$$L_v(r) = L_p(r) + \frac{1}{2} \log_{10} \left( 1 + \left( \frac{c}{2\pi fr} \right)^2 \right) \quad (5)$$

Therefore, particle-velocity level and SPL are equal when  $r$  is great. In our case, considering the male swarm sound stimulus does not have any frequency components below  $f = 745 \text{ Hz}$  (the smallest frequency value of the group of first harmonics of the swarming males at -12dB below the peak at 857 Hz, Figure S2), then we can calculate that for  $r > 15 \text{ cm}$ ,  $L_v(r) = L_p(r)$  with an error less than 1 dB.

Table 2 gives the SPL of each stimulus, which is equal to the particle-velocity level for distances from the sound-source  $< 15 \text{ cm}$ . Below 15 cm, the smaller the distance to the sound-source, the greater the particle-velocity level is, compared to the SPL. At 4 cm from the sound source, the particle-velocity level is 8 dB higher. When the difference between the SPL and the particle-velocity is greater than 1 dB, the particle-velocity level is added along the distance to the sound-source in Table 2.

## 1016 *Physical sound quantities produced by a speaker and sensed by mosquitoes*

1017 Like any sound-source, a speaker creates both a pressure field and a particle-velocity  
1018 field. At 0.9-m away from the speaker, the near-field component of the particle velocity is  
1019 negligible and then the particle-velocity level is equal to the SPL. As a consequence,  
1020 monitoring the sound pressure level of a male-swarm sound played-back on a speaker  
1021 0.9-m away from the exposed mosquito is enough to reproduce natural soundscapes of  
1022 swarms (i.e. sound-source image) located  $> 15$  cm away from the mosquito ( $< 1$ dB error).  
1023 When the distance from the sound-source image to the mosquito is expected to be  
1024 modelled as  $< 15$  cm, the particle velocity created by the speaker becomes different to the  
1025 one created by a natural swarm: its level is underestimated, and its phase is modified.

## 1026 *Formula between sound level and distance*

1027 In order to estimate the distance over which a female could hear a given-size swarm with a  
1028 given number of swarming males, we are interested in determining the equivalent distance  
1029  $r_i$  ( $i$  being the sound pressure level label) to the virtual sound source (i.e. the played-back  
1030 male swarm, or sound-source image) knowing the sound pressure level  $L_i$  at the female's  
1031 position at a distance  $r_i$  from the virtual swarm, and the sound level  $L_{ref}$  at position  $r_{ref}$   
1032 ( $r_{ref} = 0.9m$  known to be the distance to the reference sound stimulus source). The  
1033 physical sound source is the speaker, at fixed distance  $R$  from the swarming marker (i.e.  
1034 from the female  $\pm$  its movement above the marker). The sound level is set to reproduce a  
1035 natural swarm sound where the presence is virtually located at a distance  $r_i$  from the  
1036 female (see Figure 3 for a visual illustration).

1037 As a single monopole point spherically radiates in all directions (no sound  
1038 reflection), the root-mean-square sound pressure  $p_{RMS,i}$  is inversely proportional to the  
1039 distance  $r_i$  (i.e.  $p_{RMS,i} \propto \frac{1}{r_i}$ ). Then the sound pressure level difference  $\Delta L_i$  can also be  
1040 expressed as follows:

$$\Delta L_i \stackrel{\text{def}}{=} L_i - L_{ref} = 20 \log_{10} \left( \frac{r_{ref}}{r_i} \right) \quad (6)$$

1041 Then from equation 6 we get the distance  $r_i$  to the sound-source image as a  
1042 function of the difference level  $\Delta L_i$  and the known distance  $r_{ref}$  from the female's position  
1043 in relation to the sound-source image of the swarm of the reference stimulus recording:

$$r_i = r_{ref} 10^{\frac{-\Delta L_i}{20}} \quad (7)$$

1044 Sound pressure level label *ref* corresponds to the natural sound level of an *An.*  
1045 *coluzzii* 70-male swarm at a distance of 0.9 m. The equivalent distances  $r_i$  associated with  
1046 the other sound levels  $L_i$ , (i belonging to 1, 2, 3) can be calculated from equation 7: they  
1047 correspond to the SPLs 20 dB, 26 dB, 36 dB, 48 dB of a point-source 70-male swarm at a  
1048 distance of 0.9, 0.5 m, 15 cm and 4 cm, respectively (Table 2). This calculus assumes that  
1049 the female is far enough from the swarm so that the swarm dimensions are small enough  
1050 compared to its distance to the swarm (i.e. 'point-source'). Even if it is unrealistic, it helps  
1051 as a step for modelling larger distances where this issue does not occur anymore (see  
1052 below).

### 1053 ***Formula relating hearing distance and number of individuals in the swarm***

1054 Acoustic prediction was needed to cope with large swarms because of a limitation in the  
1055 number of swarming males to be recorded under controlled conditions. In our experimental  
1056 space, about 20% of the released *An. coluzzii* males and 10% of the released *An.*  
1057 *gambiae* s.s. males swarmed over the swarming spot. A small number of the non-  
1058 swarming males were flying without station-keeping behaviour in our experimental room  
1059 space (most of the remaining males were resting). However, the chance of a flying non-  
1060 swarming mosquito passing in the field of sound of the directional microphone increased  
1061 with the number of released mosquitoes. Thus, above ~70 swarming males, the number of  
1062 flying non-swarming males was too high and our sound recording could have been altered  
1063 by flying males for which the distance to the microphone and its behaviour (i.e. non-

1064 swarming flight) could not have been controlled. As a consequence, we decided to use the  
1065 70-male swarm in the behavioural experiments, which is the biggest station-keeping  
1066 swarm we could reliably produce and record in the laboratory.

1067 In order to estimate the results which could have been found with a bigger  
1068 swarm, we predicted the behavioural assay results performed with a 70-male swarm  
1069 sound stimulus using an acoustic model of the swarm sound level as a function of its  
1070 number of individuals and its distance to the female.

1071 Multiplying by  $N$  a number of acoustically incoherent sources, such as swarming  
1072 mosquitoes, increases the SPL by  $10\log_{10}(N)$  [57]. Let's assume a  $N \times 70$ -male swarm  
1073 can be modelled as a single point (see STAR\*Methods section 'Acoustic assumptions for a  
1074 swarm'), then the SPL at a fixed distance will be increased by  $10\log_{10}(N)$  (e.g. 7 dB if  $N=5$   
1075 or 20 dB if  $N=100$ ) compared to the 70-male swarm.

1076 Then we can compute the virtual distances  $r_{i,N \times 70}$  of a  $N \times 70$ -male swarm with  
1077 same SPL  $L_i$  as a 70-male swarm at distance  $r_i$ , knowing that the  $N \times 70$ -male swarm has  
1078 a SPL  $L_i + 10\log_{10}(N)$  dB at distance  $r_i$ , by the following formulae derived from equation 6  
1079 (values are presented in Table 2 for a 300, 1500, 6,000 and 10,000-male swarm):

$$r_{i,N \times 70} = r_i 10^{\frac{-(L_i - (L_i + 10\log_{10}(N)))}{20}} = \sqrt{N} r_i \quad (8)$$

1080

1081

## 1082 DATA AND SOFTWARE AVAILABILITY

1083 Software/codes used audio/video parameter extractions and statistical analysis are listed  
1084 in the Key Resources Table. Raw sound files, tracked flight dataset and dataset for the  
1085 statistical tests are available on request.

1086

## 1087 **SUPPLEMENTAL INFORMATION**

1088 See the Supplemental Information PDF for five supplemental figures and one  
1089 supplemental table.

1090

## 1091 **MULTIMEDIA FILE LEGENDS**

1092

### 1093 **Sound S1 (Sound-S1.mp3)**

1094 Sound stimulus recording of the 70-male *An. coluzzii* (7 s) before any filtering and level  
1095 adjustment. Related to Figure S2B (dotted clear blue line).

### 1096 **Sound S2 (Sound-S2.mp3)**

1097 Sound stimulus recording of the 30-male *An. gambiae* s.s. (7 s) before any filtering and  
1098 level adjustment. Related to Figure S2B (dotted dark blue line).

### 1099 **Sound S3 (Sound-S3.mp3)**

1100 Sound stimulus recording of the 30-female *An. coluzzii* (7 s) before any filtering and level  
1101 adjustment. Related to Figure S2B (dotted clear red line).

### 1102 **Sound S4 (Sound-S4.mp3)**

1103 Sound stimulus recording of the 4-female *An. gambiae* s.s. (7 s) before any filtering and  
1104 level adjustment. Related to Figure S2B (dotted dark red line).

1105

### 1106 **Video S1 (Video-S3.mp4)**

1107 Audio-video recording of the *An. coluzzii* female exposed to the loudest *An. coluzzii* male  
1108 sound (10-s silence + 7-s sound exposition + 10-s silence). Related to Figure 2.

### 1109 **Video S2 (Video-S6.mp4)**

1110 Audio-video recording of the *An. coluzzii* males exposed to the loudest *An. gambiae* s.s.  
1111 female sound (10-s silence + 7-s sound exposition + 10-s silence). Related to Figure 2.

1112

1113

## 1114 REFERENCES

1115 [1] Gibson, G. and Russel, J. I. (2006). Flying in tune: sexual recognition in mosquitoes.

1116 Current Biology 16, 1311–1316.

1117

1118 [2] Cator, L. J., Arthur, B. J., Harrington, L. C. and Hoy, R. R. (2009). Harmonic

1119 convergence in the love songs of the dengue vector mosquito. Science 323, 1077–1079.

1120

1121 [3] Warren, B., Gibson, G. and Russel, J. I. (2009). Sex recognition through midflight

1122 mating duets in *Culex* Mosquitoes is mediated by acoustic distortion. Current Biology 19,

1123 485–491.

1124

1125 [4] Pennetier, C., Warren, B., Dabire, K. R., Russel, J. I. and Gibson, G. (2010). “Singing

1126 on the wing” as a mechanism for species recognition in the malarial mosquito *Anopheles*

1127 *gambiae*. Current Biology 20, 131–136.

1128

1129 [5] Warren, B. and Russell, I. (2011). Mosquitoes on the wing “tune in” to acoustic

1130 distortion. AIP Conference Proceedings 1403, 479–480.

1131

1132 [6] Simoes, P. M. V., Ingham, R. A., Gibson, G. and Russell, I. J. (2016). A role for

1133 acoustic distortion in novel rapid frequency modulation behaviour in free-flying male

1134 mosquitoes. Journal of Experimental Biology 219, 2039– 2047.

1135



1136 [7] Su, M. P., Andrés, M., Boyd-Gibbins, N., Somers, J. and Albert, J. T. (2018). Sex and  
1137 species specific hearing mechanisms in mosquito flagellar ears. *Nature Communications*  
1138 9, 3911.

1139

1140 [8] Aldersley, A. and Cator, L. J. (2019). Female resistance and harmonic convergence  
1141 influence male mating success in *Aedes aegypti*. *Scientific Reports* 9, 2145.

1142

1143 [9] Pantoja-Sanchez, H., Gomez, S., Velez, V., Avila, F. W. and Alfonso-Parra, C. (2019).  
1144 Precopulatory acoustic interactions of the New World malaria vector *Anopheles albimanus*  
1145 (Diptera: Culicidae). *Parasites & Vectors* 12, 386.

1146

1147 [10] Belton, P. (1974). An analysis of direction finding in male mosquitoes. In *Experimental*  
1148 *Analysis of Insect Behaviour*, pp. 139–148. Berlin, Heidelberg: Springer Berlin Heidelberg.

1149

1150 [11] de Silva, P., Nutter, B. and Bernal, Ximena E. (2015). Use of acoustic signals in  
1151 mating in an eavesdropping frog-biting midge. *Animal Behaviour* 103, 45-51.

1152

1153 [12] Stokes, G. (1851). On the effect of the internal friction of fluids on the motion of  
1154 pendulums. *Trans. Cambridge Phil. Soc.* IX, 8.

1155

1156 [13] Fletcher, N. H. (1978) Acoustical response of hair receptors in insects. *Journal of*  
1157 *Comparative Physiology* 127, 185—189

1158

1159 [14] Tautz, J. (1979). Reception of particle oscillation in a medium — an unorthodox  
1160 sensory capacity. *Naturwissenschaften* 66, 452-461.

1161

- 1162 [15] Bennet-Clark, H. C. (1998). Size and scale effects as constraints in insect sound  
1163 communication. Philosophical Transactions of The Royal Society Biological Sciences 353,  
1164 407–419.
- 1165
- 1166 [16] Wishart, G. and Riordan, D. F. (1959). Flight responses to various sounds by adult  
1167 males of *Aedes aegypti* (L.) (Diptera: Culicidae). The Canadian Entomologist 91, 181–191.
- 1168
- 1169 [17] Göpfert, M. C. and Robert, D. (2000). Nanometre-range acoustic sensitivity in male  
1170 and female mosquitoes. Proceedings of the Royal Society of London. Series B: Biological  
1171 Sciences 267, 453–457.
- 1172
- 1173 [18] Windmill, J. F. C. and Jackson, J. C. (2016). Mechanical specializations of insect ears.  
1174 In Insect Hearing, Pollack, G. S., Mason, A. C., Popper, A. N and Fay, R. R. (Springer  
1175 International Publishing), pp. 125–157.
- 1176
- 1177 [19] Menda, G., Nitzany, E. I., Shamble, P. S., Wells, A., Harrington, L. C., Miles, R. N. and  
1178 Hoy, R. R. (2019). The long and short of hearing in the mosquito *Aedes aegypti*. Current  
1179 Biology 29, 709–714.
- 1180
- 1181 [20] Lapshin, D. N. (2013), The auditory system of blood-sucking mosquito females  
1182 (Diptera, Culicidae): Acoustic perception during flight simulation. Entomological Review 93,  
1183 pp. 135-149.
- 1184
- 1185 [21] Bartlett-Healy, K., Crans, W., Gaugler, R. (2008). Phonotaxis to amphibian  
1186 vocalizations in *Culex territans* (Diptera: Culicidae). Annals of the Entomological Society of  
1187 America 101, pp. 95-103.

1188

1189 [22] Bernal, X. E., Rand, A. S. and Ryan, M. J. (2006). Acoustic preferences and  
1190 localization performance of blood-sucking flies (*Corethrella Coquillett*) to túngara frog calls.  
1191 Behavioral Ecology 17, 709–715.

1192

1193 [23] Downes, J. A. (1969). The swarming and mating flight of diptera. Annual Review of  
1194 Entomology 14, 271–298.

1195

1196 [24] Charlwood, J. D. and Jones, M. D. R. (1979). Mating behaviour in the mosquito,  
1197 *Anopheles gambiae* s.l. I. Close range and contact behaviour. Physiological Entomology 4,  
1198 111–120.

1199

1200 [25] Gibson, G. (1985). Swarming behavior of the mosquito *Culex pipiens*  
1201 *quinquefasciatus*: a quantitative analysis. Physiological Entomology 10, 283– 296.

1202

1203 [26] Sawadogo, P., Namountougou, M., Toé, K., Rouamba, J., Maïga, H., Ouédraogo, K.,  
1204 Baldet, T., Gouagna, L., Kengne, P., Simard, F., Costantini, C., Gibson, G., Diabaté, A.,  
1205 Lees, R., Gilles, J. and Dabiré, K. (2014). Swarming behaviour in natural populations of  
1206 *Anopheles gambiae* and *An. coluzzii*: Review of 4 years survey in rural areas of sympatry,  
1207 Burkina Faso (West Africa). Acta Tropica 132, S42 – S52.

1208

1209 [27] Savolainen, E. and Syrjämäki, J. (1971). Swarming and mating of *Erioptera gemina*  
1210 Tjeder (Dip., Limoniidae). Annales entomologici Fennici 37, 79–85.

1211

1212 [28] Charlwood, J. D. (1976). The mating behaviour of mosquitoes. (University of Sussex).

1213

- 1214 [29] Poda, S. B., Nignan, C., Gnankiné, O., Dabiré, R. K., Diabaté, A. and Roux, O. (2019).  
 1215 Sex aggregation and species segregation cues in swarming mosquitoes: role of ground  
 1216 visual markers. *Parasites & Vectors* 12, 589.  
 1217
- 1218 [30] Diabaté, A., Yaro, A. S., Dao, A., Diallo, M., Huestis, D. L. and Lehmann, T. (2011).  
 1219 Spatial distribution and male mating success of *Anopheles gambiae* swarms. *BMC*  
 1220 *Evolutionary Biology* 11, 184.  
 1221
- 1222 [31] Assogba, B. S., Djogbénou, L., Saizonou, J., Diabaté, A., Dabiré, R. K., Moiroux, N.,  
 1223 Gilles, J. R., Makoutodé, M. and Baldet, T. (2014). Characterization of swarming and  
 1224 mating behaviour between *Anopheles coluzzii* and *Anopheles melas* in a sympatry area of  
 1225 Benin. *Acta Tropica* 132, S53 – S63.  
 1226
- 1227 [32] Sawadogo, S. P., Costantini, C., Pennetier, C., Diabaté, A., Gibson, G. and Dabiré, R.  
 1228 K. (2013). Differences in timing of mating swarms in sympatric populations of *Anopheles*  
 1229 *coluzzii* and *Anopheles gambiae* s.s. (formerly *An. gambiae* M and S molecular forms) in  
 1230 Burkina Faso, West Africa. *Parasites & Vectors* 6, 275.  
 1231
- 1232 [33] Diabate, A. and Tripet, F. (2015). Targeting male mosquito mating behaviour for  
 1233 malaria control. *Parasites & Vectors* 8, 347.  
 1234
- 1235 [34] Manoukis, N. C., Diabaté, A., Abdoulaye, A., Diallo, M., Dao, A., Yaro, A. S., Ribeiro,  
 1236 J. M. C. and Lehmann, T. (2009). Structure and dynamics of male swarms of *Anopheles*  
 1237 *gambiae*. *Journal of Medical Entomology* 46, 227–235.  
 1238

- 1239 [35] Wesenberg-Lund, C. (1920). Contributions to the biology of the Danish Culicidae.  
1240 Kobenhavn (A.F. Host & Son)  
1241
- 1242 [36] Mankin, R. W. (1994). Acoustical detection of *Aedes taeniorhynchus* swarms and  
1243 emergence exoduses in remote salt marshes. Journal of the American Mosquito Control  
1244 Association 10, 302–308.  
1245
- 1246 [37] Belton, P. (1994). Attraction of male mosquitoes to sound. Journal of American  
1247 Mosquito Control Association 10, pp 297-301.  
1248
- 1249 [38] Gibson, G., Warren, B. and Russel, J. I. (2010). Humming in tune: sex and species  
1250 recognition by mosquitoes on the wing. JARO 11, 527–540.  
1251
- 1252 [39] Cator, L. J., Ng'Habi, K. R., Hoy, R. R. and Harrington, L. C. (2010). Sizing up a mate:  
1253 variation in production and response to acoustic signals in *Anopheles gambiae*. Behavioral  
1254 Ecology 21, 1033–1039.  
1255
- 1256 [40] Aldersley, A., Champneys, A., Homer, M. and Robert, D. (2016). Quantitative analysis  
1257 of harmonic convergence in mosquito auditory interactions. Journal of The Royal Society  
1258 Interface 13.  
1259
- 1260 [41] Costantini, C., Ayala, D., Guelbeogo, W. M., Pombi, M., Some, C. Y., Bassole, I. H.,  
1261 Ose, K., Fotsing, J.-M., Sagnon, N., Fontenille, D., Besansky, N. J. and Simard, F. (2009).  
1262 Living at the edge: biogeographic patterns of habitat segregation conform to speciation by  
1263 niche expansion in *Anopheles gambiae*. BMC Ecology 9, 16.  
1264

- 1265 [42] Simard, F., Ayala, D., Kamdem, G. C., Pombi, M., Etouna, J., Ose, K., Fotsing, J.-M.,  
1266 Fontenille, D., Besansky, N. J. and Costantini, C. (2009). Ecological niche partitioning  
1267 between *Anopheles gambiae* molecular forms in Cameroon: the ecological side of  
1268 speciation. BMC Ecology 9, 17.
- 1269
- 1270 [43] Tripet, F., Dolo, G., Traoré, S. and Lanzaro, G. C. (2004). The "wingbeat hypothesis"  
1271 of reproductive isolation between members of the *Anopheles gambiae* complex (Diptera:  
1272 Culicidae) does not fly. Journal of Medical Entomology 41, 375–384.
- 1273
- 1274 [44] Simoes, P. M. V., Gibson, G. and Russel, J. I. (2017). Pre-copula acoustic behaviour  
1275 of males in the malarial mosquitoes *Anopheles coluzzii* and *Anopheles gambiae* s.s. does  
1276 not contribute to reproductive isolation. Journal of Experimental Biology 220, 379–385.
- 1277
- 1278 [45] Charlwood, J. D. and Jones, M. D. R. (1980). Mating in the mosquito, *Anopheles*  
1279 *gambiae* s.l. II. Swarming behaviour. Physiological Entomology 5, 315–320.
- 1280
- 1281 [46] Lapshin, D. N. and Vorontsov, D. D. (2019). Directional and frequency characteristics  
1282 of auditory neurons in *Culex* male mosquitoes. Journal of Experimental Biology 222.
- 1283
- 1284 [47] Warren, B., Lukashkin, A. N. and Russell, I. J. (2010). The dynein-tubulin motor  
1285 powers active oscillations and amplification in the hearing organ of the mosquito.  
1286 Proceedings of the Royal Society B: Biological Sciences 277, 1761–1769.
- 1287
- 1288 [48] Dabiré, R. K., Sawadogo, S. P., Diabaté, A., Toé, K. H., Kengne, P., Ouari, A.,  
1289 Costantini, C., Gouagna, L. C., Simard, F., Baldet, T., Lehmann, T. and Gibson, G. (2013).  
1290 Assortative mating in mixed swarms of the mosquito *Anopheles gambiae* s.s. M and S

1291 molecular forms, in Burkina Faso, West Africa. Medical and Veterinary Entomology 27,  
1292 298–312.

1293

1294 [49] Mozūraitis, R., Hajkazemian, M. Zawada, J. W., Szymczak, J., Pålsson, K., Sekar, V.,  
1295 Biryukova, I., Friedländer, M. R., Koekemoer, L. L., Baird, J. K., Borg-Karlson, A.-K.,  
1296 Emami, S. N. (2020). Male swarming aggregation pheromones increase female attraction  
1297 and mating success among multiple African malaria vector mosquito species. Nature  
1298 Ecology & Evolution

1299

1300 [50] Poda, S. B., Buatois, B., Lapeyre, B., Dormont, L., Diabaté, A., Gnankiné, O., Dabiré ,  
1301 R. K. (2020). No evidence for long-range male sex pheromones in two malaria  
1302 mosquitoes, bioRxiv, doi: <https://doi.org/10.1101/2020.07.05.187542>

1303

1304 [51] Fanello, C., Santolamazza, F. and Della Torre, A. (2002). Simultaneous identification  
1305 of species and molecular forms of the *Anopheles gambiae* complex by PCR-RFLP.  
1306 Medical and Veterinary Entomology 16, 461–464.

1307

1308 [52] Fry, S., Muller, P., Baumann, H.-J., Straw, A., Bichsel, M. and Robert, D. (2004).  
1309 Context-dependent stimulus presentation to freely moving animals in 3D. Journal of  
1310 Neuroscience Methods 135, 149–157.

1311

1312 [53] Cribellier, A., van Erp, J. A., Hiscox, A., Lankheet, M. J., van Leeuwen, J. L., Spitzen,  
1313 J. and Muijres, F. T. (2018). Flight behaviour of malaria mosquitoes around odour-baited  
1314 traps: capture and escape dynamics. Royal Society Open Science 5, 180246.

1315

- 1316 [54] Crawley, M. J. (2007). Mixed-Effects Models. In The R book (John Wiley & Sons), pp.  
1317 627–660.  
1318
- 1319 [55] Errede, P. S. (2020). Examples of Complex Sound Fields. In Lecture XII - Part 2,  
1320 P406POM Lecture Notes (Urbana-Champaign, Illinois: Department of Physics, University  
1321 of Illinois),  
1322 [https://courses.physics.illinois.edu/phys406/sp2017/Lecture\\_Notes/P406POM\\_Lecture\\_No](https://courses.physics.illinois.edu/phys406/sp2017/Lecture_Notes/P406POM_Lecture_Notes/P406POM_Lect12_Part2.pdf)  
1323 [tes/P406POM\\_Lect12\\_Part2.pdf](https://courses.physics.illinois.edu/phys406/sp2017/Lecture_Notes/P406POM_Lecture_Notes/P406POM_Lect12_Part2.pdf) (Last viewed May 15, 2020).  
1324
- 1325 [56] Beranek, L. L. and Mellow, T. J. (2012). Acoustics: sound fields and transducer,  
1326 Academic Press.  
1327
- 1328 [57] Blauert, J. and Xiang, N. (2009). Acoustics for engineers: Troy lectures (Springer)



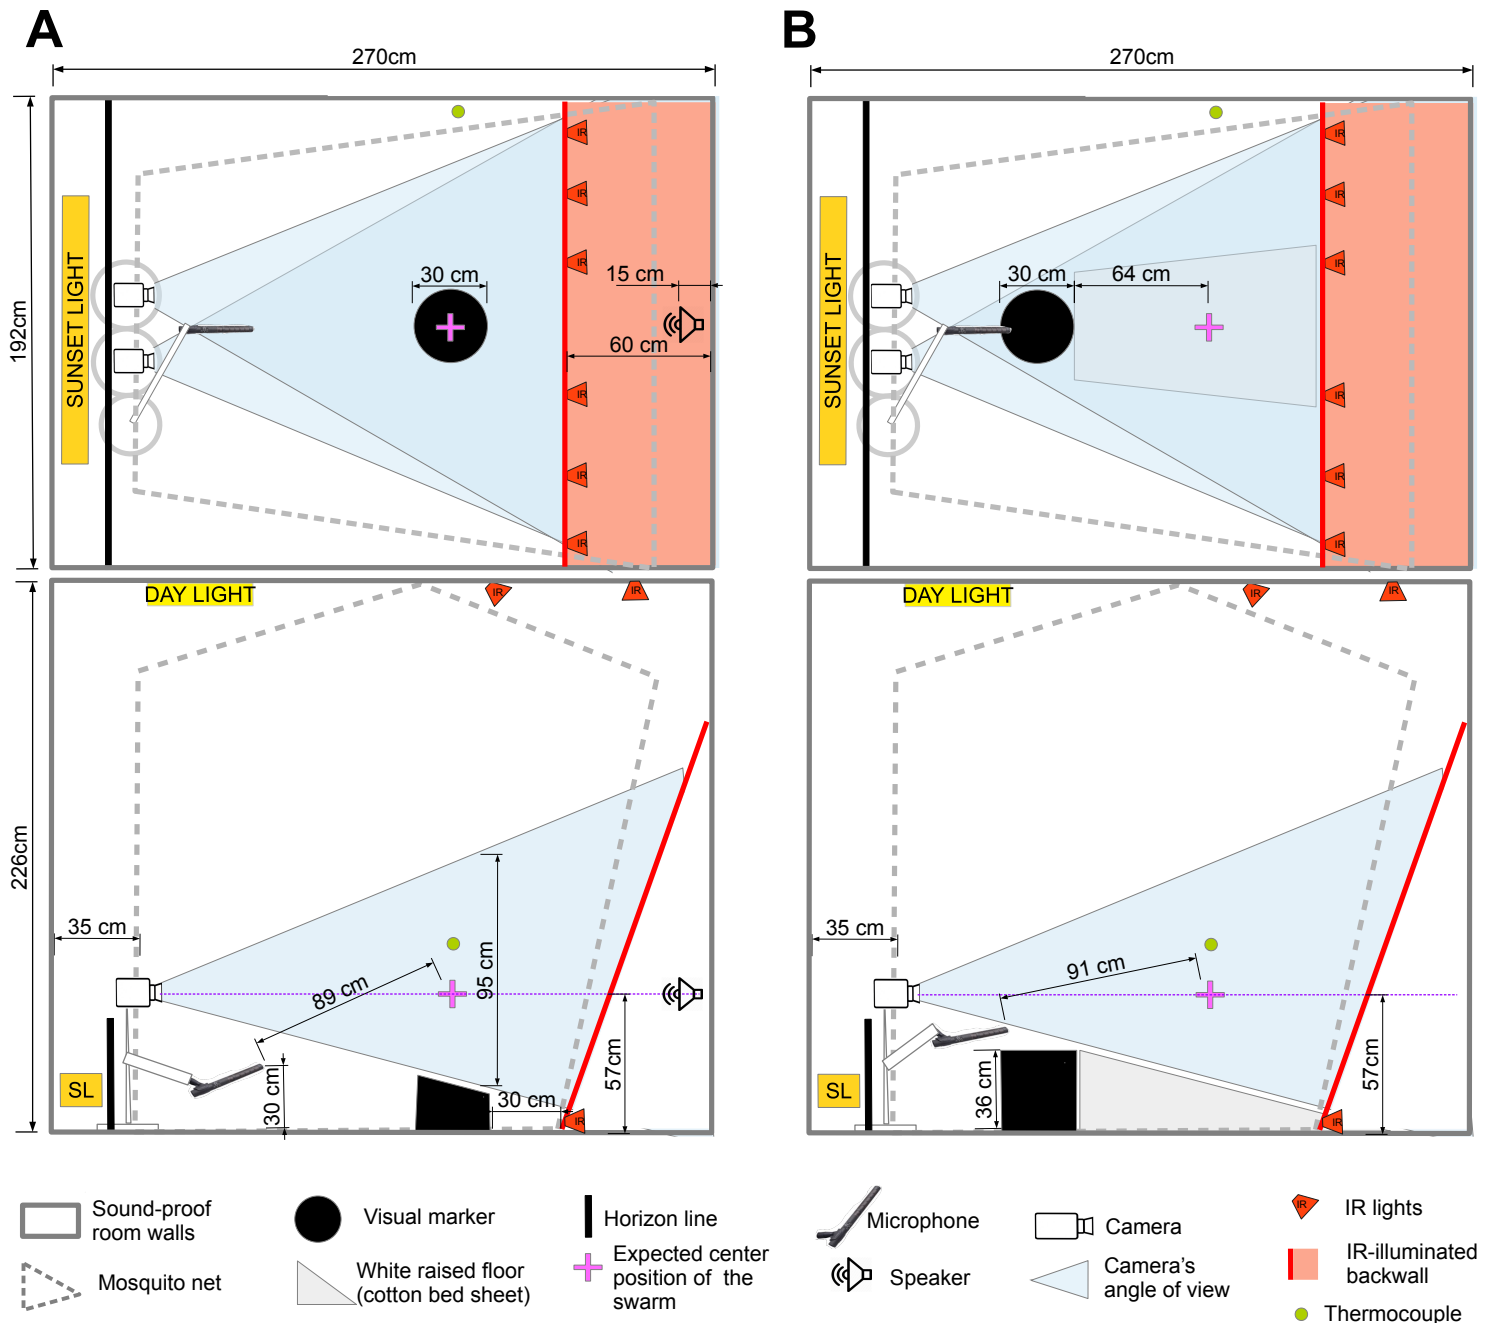

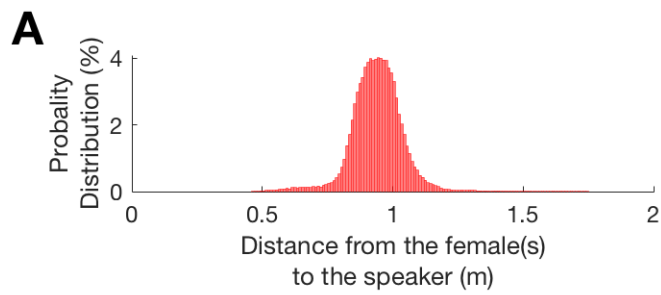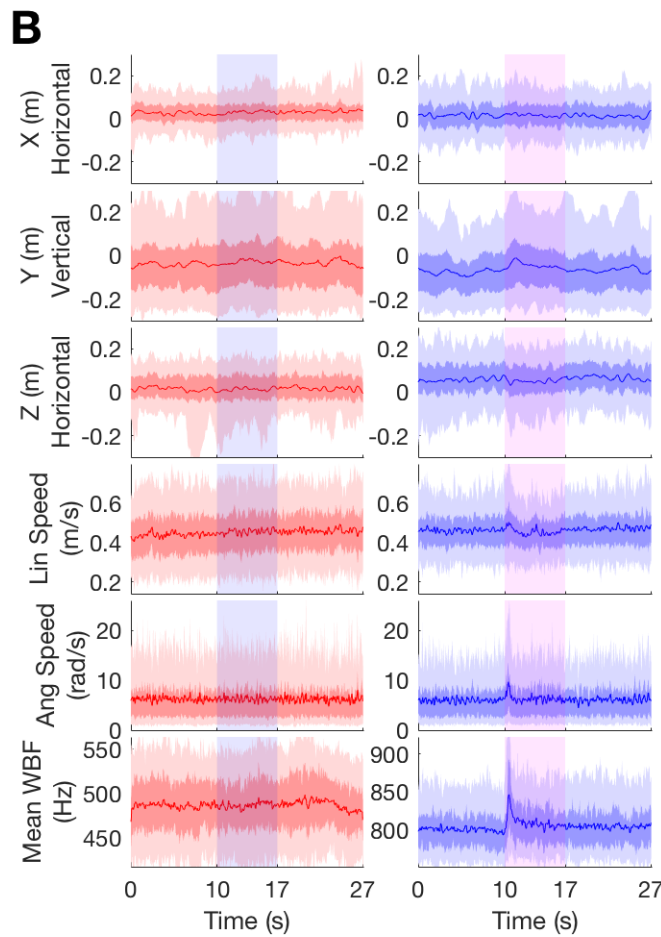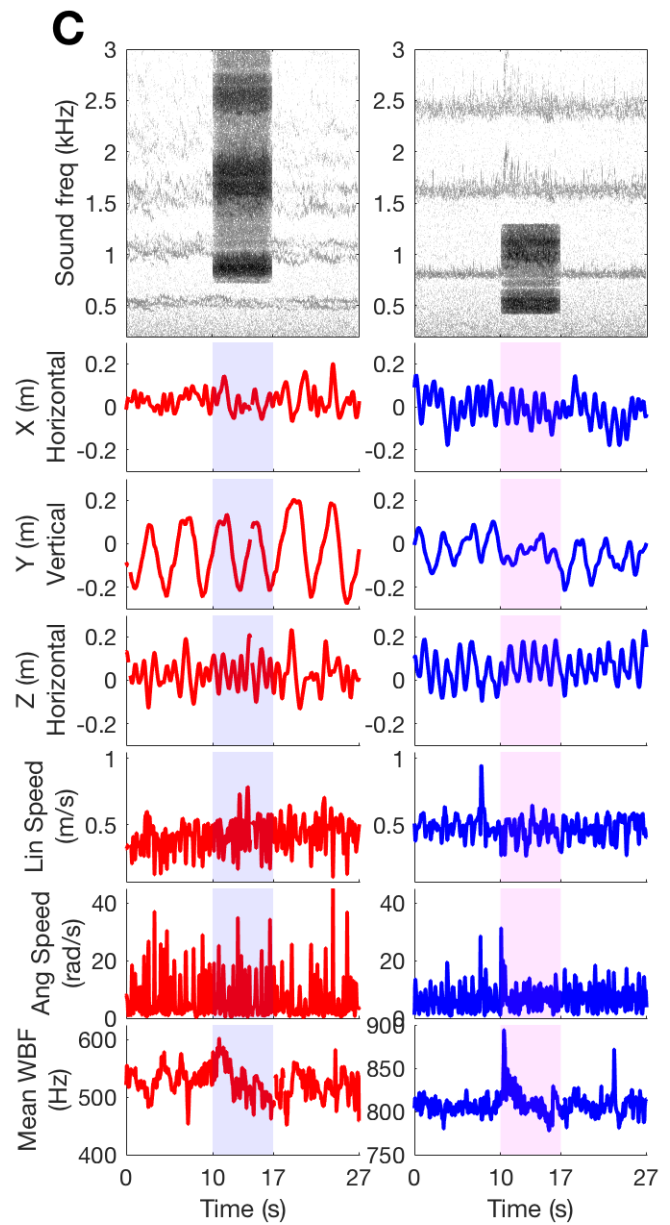

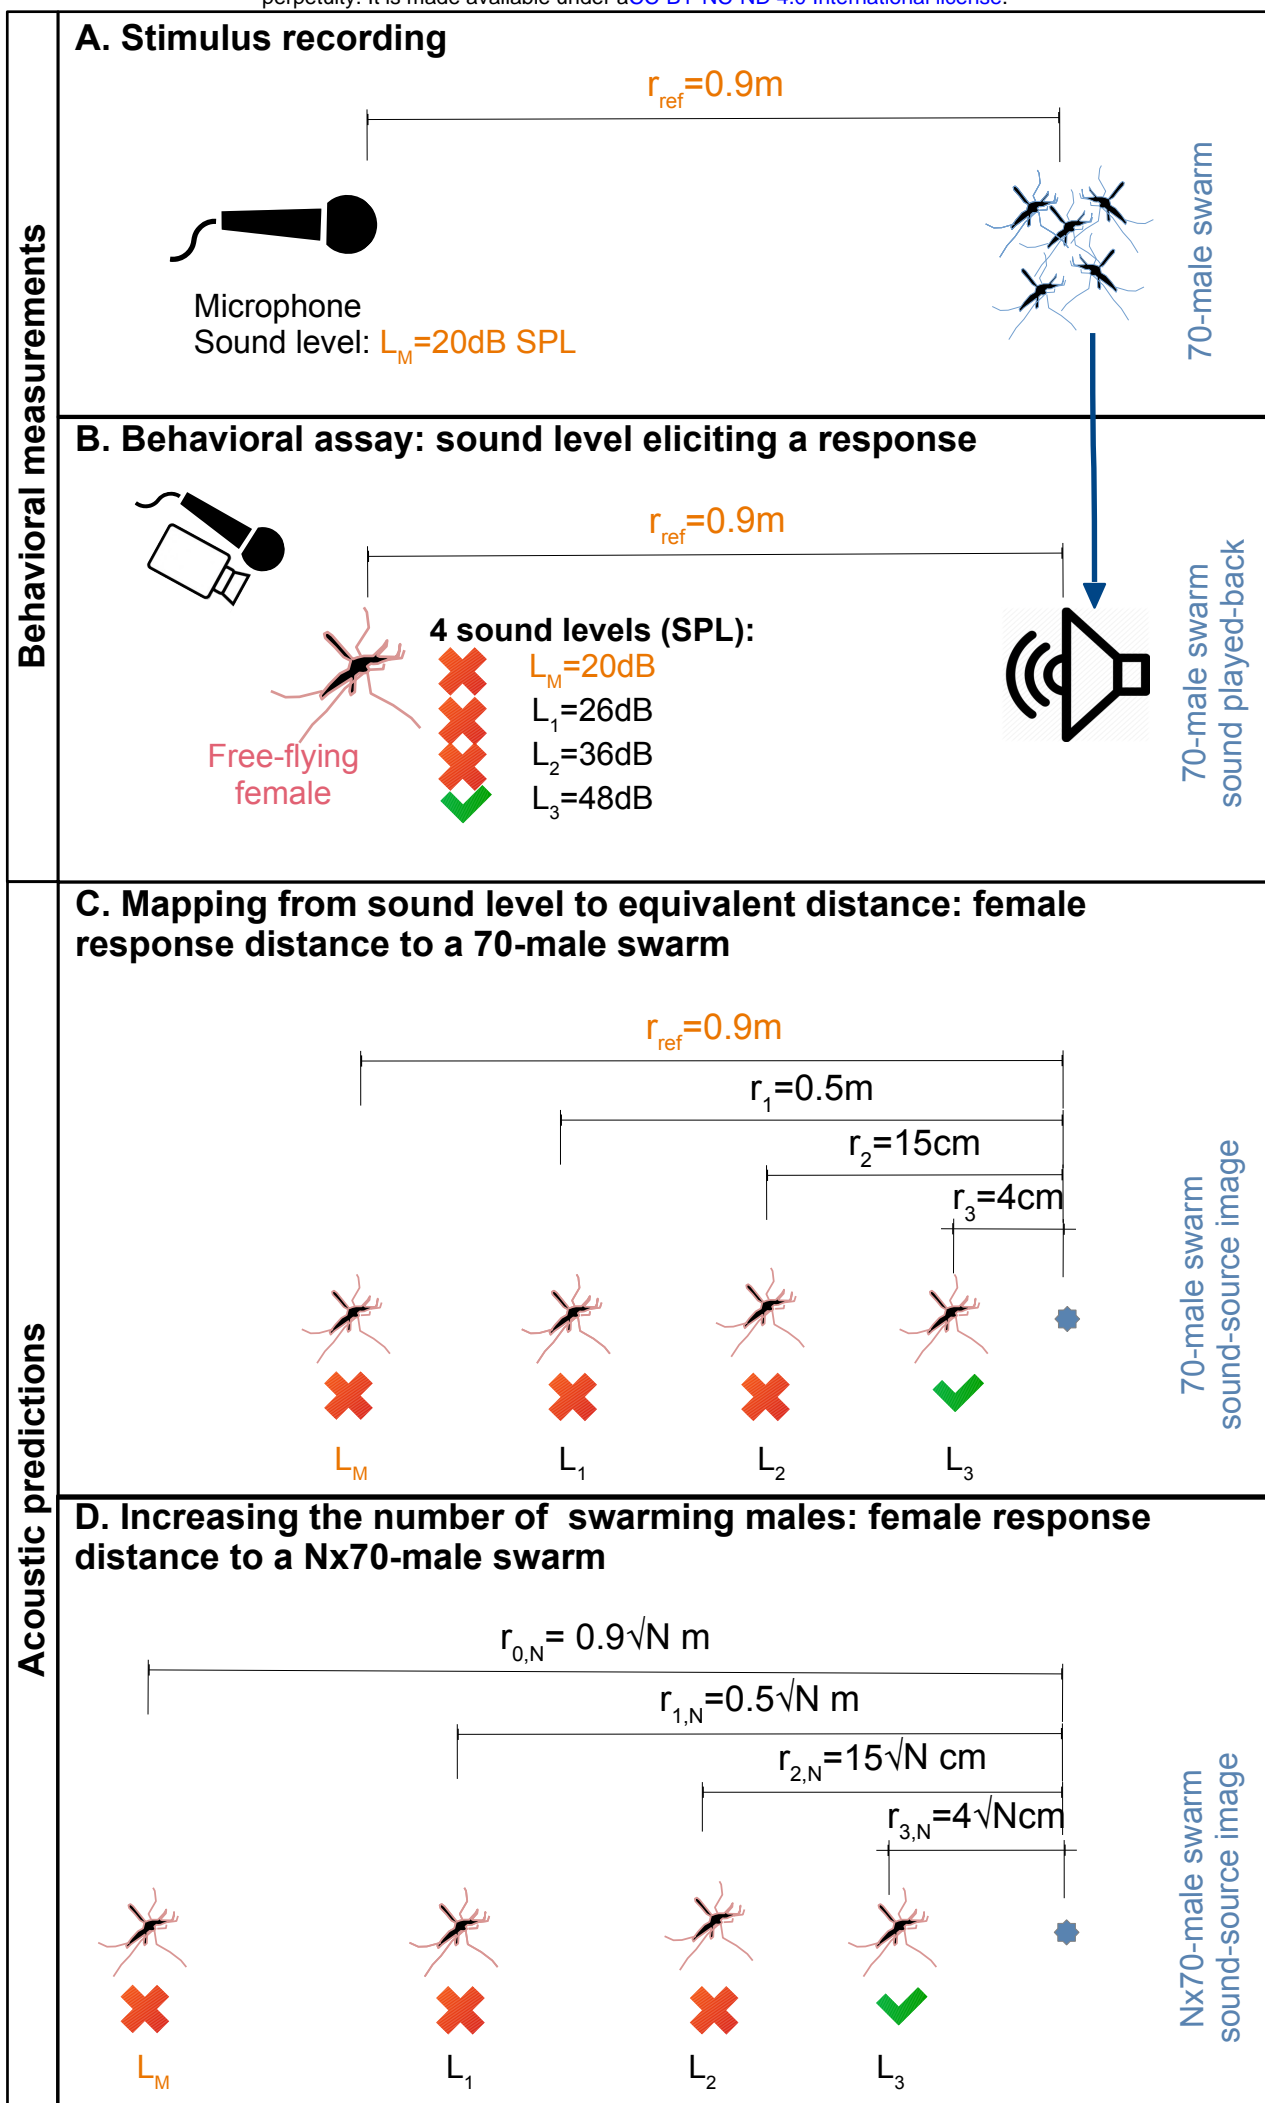

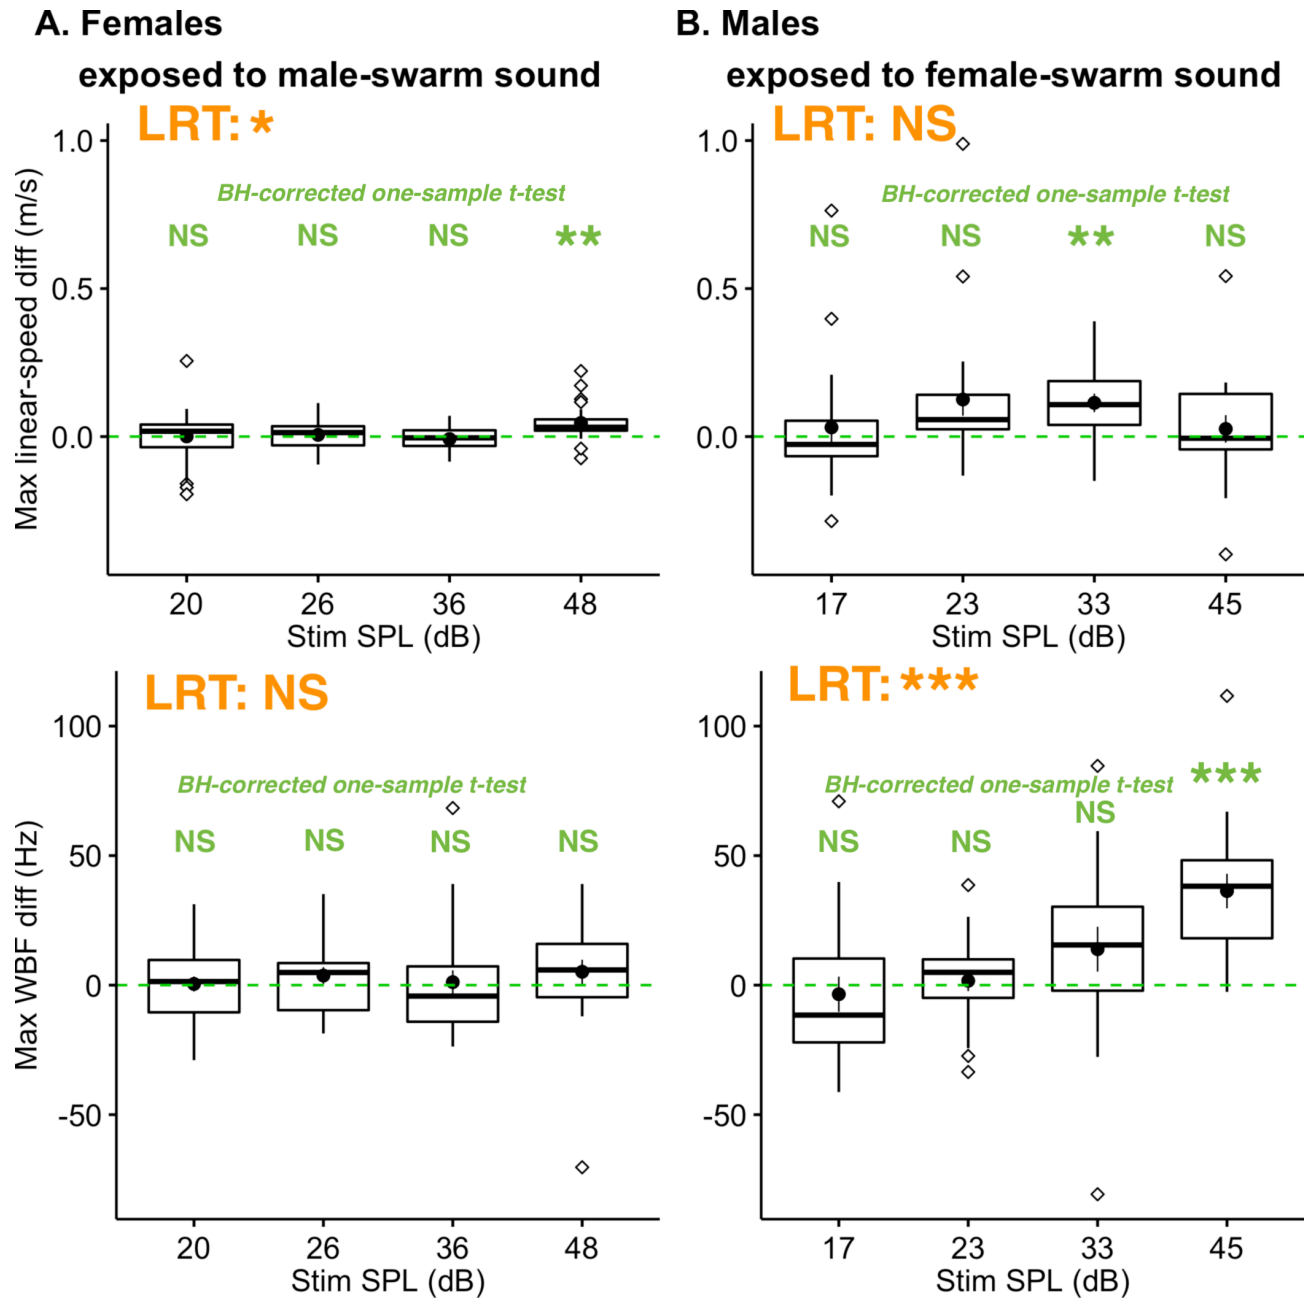

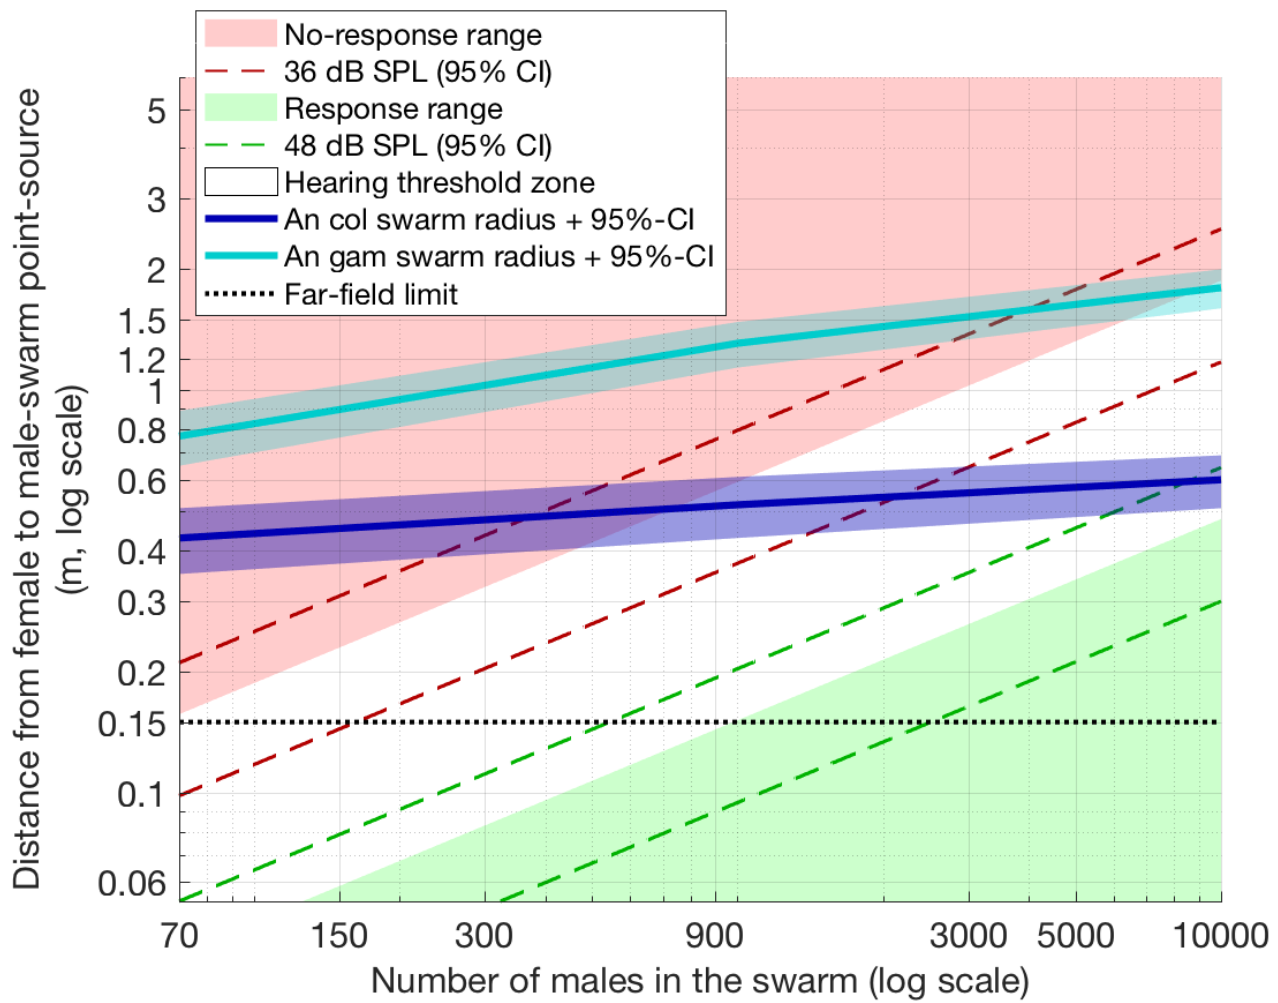

Source: https://www.biorxiv.org/content/10.1101/2020.09.01.277202v1.full.pdf
